# FABP6 serves as a new therapeutic target in esophageal tumor

Dengfeng Zhang<sup>1,\*</sup>, Fangchao Zhao<sup>1,\*</sup>, Haitao Liu<sup>2,\*</sup>, Pengfei Guo<sup>1,\*</sup>, Zhirong Li<sup>1</sup>, Shujun Li<sup>1</sup>

<sup>1</sup>Department of Thoracic Surgery, The Second Hospital of Hebei Medical University, Shijiazhuang, Hebei 050000, China

<sup>2</sup>College of Life Science, Inner Mongolia University, Hohhot, Inner Mongolia 010031, China

\*Equal contribution

**Correspondence to:** Shujun Li, Zhirong Li; email: [lishujun2333@163.com](mailto:lishujun2333@163.com), <https://orcid.org/0000-0001-5959-3160>; [lizhirong@hebmh.edu.cn](mailto:lizhirong@hebmh.edu.cn)

**Keywords:** esophageal tumor, FABP6, Treg, prognostic biomarker, migration

**Received:** September 8, 2023

**Accepted:** December 4, 2023

**Published:** January 25, 2024

**Copyright:** © 2024 Zhang et al. This is an open access article distributed under the terms of the [Creative Commons Attribution License](https://creativecommons.org/licenses/by/4.0/) (CC BY 4.0), which permits unrestricted use, distribution, and reproduction in any medium, provided the original author and source are credited.

## ABSTRACT

**Background:** Esophageal cancer is one of the most common malignant tumors with high incidence and mortality rates. Despite the continuous development of treatment options, the prognosis for esophageal cancer patients remains poor. Therefore, there is an urgent need for new diagnostic and therapeutic targets in clinical practice to improve the survival of patients with esophageal cancer.

**Methods:** In this study, we conducted a comprehensive scRNA-seq analysis of the tumor microenvironment in primary esophageal tumors to elucidate cell composition and heterogeneity. Using Seurat, we identified eight clusters, encompassing non-immune cells (fibroblasts, myofibroblasts, endothelial cells, and epithelial cells) and immunocytes (myeloid-derived cells, T cells, B cells, and plasma cells). Compared to normal tissues, tumors exhibited an increased proportion of epithelial cells and alterations in immune cell infiltration. Analysis of epithelial cells revealed a cluster (cluster 0) with a high differentiation score and early distribution, suggesting its importance as a precursor cell.

**Results:** Cluster 0 was characterized by high expression of FABP6, indicating a potential role in fatty acid metabolism and tumor growth. T cell analysis revealed shifts in the balance between Treg and CD8<sup>+</sup> effector T cells in tumor tissues. Cellular communication analysis identified increased interactions between FABP6<sup>+</sup> tumor cells and T cells, with the involvement of the MIF-related pathway and the CD74-CD44 interaction. This study provides insights into the cellular landscape and immune interactions within esophageal tumors, contributing to a better understanding of tumor heterogeneity and potential therapeutic targets.

## INTRODUCTION

Esophageal cancer is among the most prevalent malignancies worldwide, with high incidence and mortality rates. In recent years, it has shown an increasing trend and tends to affect younger individuals. It ranks as the eighth most common cancer and the sixth leading cause of cancer-related death globally [1, 2]. Despite the continuous development of treatment modalities, such as surgery combined with radiotherapy and chemotherapy, the prognosis for patients with esophageal cancer remains generally poor. In most

countries, the 5-year survival rate after diagnosis is still low, ranging from 10% to 30% [3]. The inactivation of tumor suppressor genes and activation of oncogenes play crucial roles in the development of esophageal cancer [4, 5]. Therefore, there is an urgent need for novel diagnostic and therapeutic targets in clinical practice to enhance the survival of patients with esophageal cancer.

Single-cell technology is an area of research and analysis of individual cells that utilizes high-throughput sequencing and other techniques to reveal information

on gene expression, genomic variations, protein expression, and other aspects of a single cell [6]. In this article, we conducted a comprehensive scRNA-seq analysis of the tumor microenvironment in primary esophageal tumors to elucidate cell composition and heterogeneity. Using Seurat, we identified eight clusters, encompassing non-immune cells (fibroblasts, myofibroblasts, endothelial cells, and epithelial cells) and immunocytes (myeloid-derived cells, T cells, B cells, and plasma cells). Compared to normal tissues, tumors exhibited an increased proportion of epithelial cells and alterations in immune cell infiltration. Analysis of epithelial cells revealed a cluster (cluster 0) with a high differentiation score and early distribution, suggesting its importance as a precursor cell. Cluster 0 was characterized by high expression of FABP6, indicating a potential role in fatty acid metabolism and tumor growth. T cell analysis revealed shifts in the balance between Treg and CD8+ effector T cells in tumor tissues. Cellular communication analysis identified increased interactions between FABP6+ tumor cells and T cells, with the involvement of the MIF-related pathway and the CD74-CD44 interaction. This study provides insights into the cellular landscape and immune interactions within esophageal tumors, contributing to a better understanding of tumor heterogeneity and potential therapeutic targets.

## MATERIALS AND METHODS

### Data availability

Retrieve the single-cell dataset pertaining to Esophageal Squamous Cell Carcinoma (ESCC) from Gene Expression Omnibus (GEO; <https://www.ncbi.nlm.nih.gov/geo/>) with dataset ID GSE160269. The dataset originates from Homo sapiens and its data platform is GPL24676. For transcriptome data, we downloaded the TCGA-ESCA dataset from the TCGA GDC website (<https://portal.gdc.cancer.gov/>). In addition, we supplemented the control group with normal tissue information obtained from the GTEx Portal website (<https://www.gtexportal.org/home/>). The FPKM normalized gene expression data and clinical information for ESCC were obtained from The Cancer Genome Atlas (TCGA). In R, the “surv\_cutpoint” function from the survminer package was employed with a median value (Cutoff-High (%) = 50, Cutoff-Low (%) = 50) as the cutoff point for survival analysis. Kaplan-Meier method was utilized to measure survival curves, and *p*-values were calculated using the log-rank test.

### Single-cell RNA-seq analysis

The R package Seurat [7] was employed to identify distinct cell types and investigate variations in immune

cell infiltration. To ensure data quality, cells were filtered based on the following criteria: those with fewer than 100 genes, over 7500 genes, or more than 4% mitochondrial expression were excluded from the analysis. Normalization of raw counts was performed using the “NormalizeData” function in Seurat. Next, the “FindVariableGenes” function was applied to identify genes with significant variation across the dataset. To prepare the data for dimensionality reduction, the “ScaleData” function in Seurat was used to scale and center the expression values. For dimensionality reduction, Principal Component Analysis (PCA) and Uniform Manifold Approximation and Projection (UMAP) were implemented. The first 20 dimensions resulting from PCA and UMAP were selected for visualization purposes. To cluster the cells based on their gene expression profiles, the “FindClusters” function in Seurat was employed. This allowed for the identification of distinct cell populations within the dataset. To determine highly expressed genes specific to each cell cluster, the “FindAllMarkers” function was utilized. This function helps identify genes that are significantly enriched in specific cell populations. Furthermore, to identify differentially expressed genes (DEGs) between two cell populations, the “FindMarkers” function was applied. This function facilitates the identification of genes that show significant expression differences between the specified cell populations. Overall, the combination of these Seurat functions provided a comprehensive analysis pipeline for cell type identification, exploration of immune cell infiltration patterns, and identification of differentially expressed genes in the dataset.

### Cell-cell interaction analysis

CellChat [8] was employed to predict potential cell-cell interactions. The raw counts and cell type annotations of each cell were inputted into CellChat for analysis. This software enables the modeling of intercellular communication through three core modules: (1) cross-referencing the ligand-receptor interaction database to identify potential cell-cell signaling relationships, (2) utilizing network algorithms to infer and visually map communication pathways between cell types, and (3) leveraging quantitative techniques to analyze the dynamics and relative strengths of intercellular signaling interactions. Together, these three pillars provide an integrated platform for examining and characterizing the complex signaling networks underlying multicellular system behavior.

### Pseudo-time analysis

To explore the developmental timing and trajectory of esophageal tumor cells, we employed Monocle [9]. This

powerful tool applies advanced algorithms to infer the sequential changes in gene expression that each cell undergoes as part of a dynamic biological process. By utilizing unsupervised or semi-supervised learning, Monocle constructs a trajectory of cells arranged in a simulated time sequence based on the input data. This enables us to gain insights into the developmental progression of esophageal tumor cells and understand the underlying molecular changes driving their differentiation.

### **Cell-cell ligand receptor interaction analysis**

We employed NicheNet [10] to predict the ligands responsible for driving transcriptome changes in target cells. This computational approach utilizes the expression profiles of both sender and target cells to construct potential ligand-receptor interactions. What sets NicheNet apart is its innovative ability to predict the ligand-target gene connections between interacting cells by integrating cell expression data, signal intensity, and gene regulation networks. By leveraging these factors, NicheNet enables the identification of crucial ligands involved in cell communication, shedding light on the molecular mechanisms underlying cellular interactions and their impact on gene expression patterns.

### **Gene enrichment analysis**

The gene enrichment analysis of the identified genes obtained through the “FindAllMarkers” function was performed using the R package Cluster Profiler [11]. Cluster Profiler is a widely utilized R package that offers a comprehensive set of tools for interpreting omics data. It enables functional annotation and enrichment analysis of diverse gene sets, along with the visualization of enrichment analysis results. With its support for multiple gene sets and pathway databases, Cluster Profiler proves to be an excellent choice for our study, providing valuable insights into the functional significance and biological pathways associated with the identified genes.

### **Assessing the heterogeneity of single-cell populations**

In our study, we employed ROGUE [12], a universal entropy-based metric, to assess the purity of the major cell populations and compare their heterogeneity. The ROGUE algorithm calculates the purity of a specific cell cluster, yielding an index that falls within the range of zero to one. A higher index value indicates a higher level of purity within the cluster. A score of zero corresponds to the most heterogeneous cell population, while a score of one signifies a completely pure population. By utilizing ROGUE, we were able to quantitatively evaluate the homogeneity of the cell

populations and gain insights into the degree of cellular diversity within our study.

### **Pathway enrichment analysis**

In our analysis, we employed PROGENy [13] to predict the activity of 14 signaling pathways, including androgen, estrogen, EGFR, hypoxia, JAK-STAT, MAPK, NFK-B, PI3K, p53, TGF-b, TNF-a, Trail, VEGF, and WNT, using gene expression data. PROGENy assigns a weight to each gene based on its responsiveness to the corresponding pathway disturbance, indicating the magnitude and direction of pathway adjustment. Subsequently, the pathway score is calculated as the weighted sum of the product of gene expression and weight. PROGENy is widely utilized as a tool for inferring pathway activity from gene expression data. It provides valuable insights into the biological processes that are altered in a given sample, offering a deeper understanding of the signaling pathway dynamics at play. By leveraging PROGENy, we were able to gain insights into the activity levels of these specific pathways and unravel their potential roles in the biological context under investigation.

### **Transcription factor activity analysis**

To analyze transcription factor activity in single cells, we utilized the SCENIC algorithm, which was first introduced in the prestigious scientific journal *Nature Methods* in 2017 [14]. SCENIC employs co-expression and motif analysis techniques to reconstruct gene regulatory networks based on single-cell transcriptome data. By leveraging the information contained within the cis-regulatory network, SCENIC enables the identification of transcription factors and cell states. One of the key advantages of SCENIC is its ability to automatically eliminate batch effects, such as tumor sample specificity, by focusing on biologically driven features. This ensures that the analysis is robust and accurately captures the underlying regulatory dynamics within the single-cell transcriptome data. By utilizing SCENIC, we were able to gain insights into the activity levels of transcription factors and understand their roles in driving cellular heterogeneity and regulatory processes within the studied context.

### **Patient samples**

The tumor tissues and matched adjacent normal esophageal tissues were collected from six patients undergoing surgical resection at the Second Hospital of Hebei Medical University in July of 2023. All patients provided written informed consent, and the study was approved by the Research Ethics Committee of the Second Hospital of Hebei Medical University.

## Cell lines

The esophageal cancer cell lines KYSE30, KYSE150, ECA109, and normal esophageal epithelial cell line HET1A were purchased from Procell Life Science & Technology Co., Ltd (Wuhan, China). All cell lines were cultured according to the manufacturer's instructions.

## Detection of mRNA expression by quantitative fluorescence polymerase chain reaction (qRT-PCR)

RNA was extracted from the samples using TRIzol reagent (Invitrogen, Grand Island, NY, USA), a commercially available reagent used for isolating total RNA from cells and tissues for PCR analysis. The extracted RNA was subjected to reverse transcription using Superscript III Transcriptase (Invitrogen), following the manufacturer's instructions. Quantitative real-time PCR (qRT-PCR) was performed using SYBR green and a Bio-Rad CFX96 system to quantify the mRNA expression level of the target genes. The initial step involved incubating the samples at 50°C for 2 minutes, followed by heating to 95°C for 8 minutes and 30 seconds. This was followed by 45 cycles at 95°C for 15 seconds each, and 60°C for 1 minute. The extension step included 95°C for 1 min, 55°C for 1 min, and 55°C for 10 s. The expression levels were normalized to the expression of GAPDH, which served as the internal control. The primer sequences used for qRT-PCR are listed below:

FABP6 5'-ACCGGCAAGTTCGAGATGG-3'  
FABP6 3'-CCTTTTCGATTACATCGCTGGA-5'  
GAPDH 5'-TGTGGGCATCAATGGATTTGG-3'  
GAPDH 3'-ACACCATGTATTCCGGGTCAAT-5'

## siRNAs transfection

To downregulate FABP6 expression, siRNA-FABP6#1 and siRNA-FABP6#2 (GenePharma) were employed, while a non-specific siRNA-NC (GenePharma) served as a control. The Lipofectamine RNAiMAX was used to facilitate siRNA transfection, following the manufacturer's instructions. After a 48-hour incubation period with siRNA complexes, ECA109 and KYSE30 cell lines proceeded to the subsequent step. The sequences of the involved siRNAs are provided below:

siRNA-FABP6#1  
Sense: 5'-GGAGAGUGAGAAGAAUUAUTT-3'  
Antisense: 5'-AUAAUUCUUCUCACUCUCCTT-3';  
siRNA-FABP6#2  
Sense: 5'-GCCCCGAACUUAAGAUCGTT-3'  
Antisense: 5'-CGAUCUUGAAGUUGCGGGCTT-3';  
siRNA-NC  
Sense: 5'-UUCUCCGAACGUGUCACGUTT-3'  
Antisense: 5'-ACGUGACACGUUCGGAGAATT-3'.

## Western blotting assay

Total proteins were extracted using RIPA whole-cell lysis solution. The proteins were separated through 8-12% SDS-PAGE electrophoresis, measured, and semi-dry transferred to PVDF membranes (Millipore, Billerica, MA, USA). The PVDF membranes were blocked with TBS + Tween (TBST) solution containing 5% skim milk powder for 2 hours, washed, and then incubated with a primary antibody (FABP6, 13781-1-AP, Proteintech, 1:50) overnight at 4°C. The membranes were subsequently washed and exposed to a secondary antibody labeled with horseradish peroxidase for 2 hours. Following the washing of the PVDF membrane, the chemiluminescent substrate was applied, and the gray-scale values were measured using a gel imaging system.

## Transwell migration experiments

The cells were harvested using serum-free media and seeded into the upper chambers of polycarbonate membrane filters with a pore size of 8.0 µm (Corning Incorporated, Corning, NY, USA) at a density of  $1 \times 10^5$ /mL. Subsequently, 600 µL of media containing 10% FBS was added to the lower chambers, and the cells were incubated at 37°C for 36 hours. To minimize potential bias in the results, three replicate wells were established for each experimental group, and each experiment was repeated thrice. The field of view for cell counting was randomly selected, and images were concurrently captured. Using Image J software, the number of migrating cells was quantified.

## Wound-healing assay to detect cell migration

Before the addition of tumor cells, three parallel lines were marked on the back of a 6-well plate. The cells were seeded at a density of  $1 \times 10^5$  cells per well and subsequently transfected with si-FABP6 and si-NC after complete adherence to the well. After 24 hours, tumor cell growth was monitored, and a 10 µL gun was used to create a scratch perpendicular to the horizontal line on the back of the 6-well plate. The cells were washed with phosphate buffer solution (PBS) and cultured in serum-free medium at 37°C with 5% CO<sub>2</sub> in an incubator. The width of the scratch was measured using Image J software, and the cell migration rate was subsequently calculated. The culture medium was maintained at 37°C with 5% CO<sub>2</sub> in an incubator for the duration of the experiment.

## Immunohistochemical stainings and evaluation

Immunohistochemical staining was conducted using 4 µm paraffin-embedded tissue cross sections. The sections were deparaffinized with xylene and rehydrated,



followed by pre-incubation with 10% normal goat serum (710027, KPL, USA). Thereafter, the sections were incubated overnight at 4°C with a primary antibody (FABP6, 13781-1-AP, Proteintech, 1:50). Following washing, horseradish peroxidase-labeled rabbit IgG antibody (021516, KPL, USA) was used as the secondary antibody. The color development reaction was performed using the DAB substrate kit. Finally, the sections were counterstained with hematoxylin and evaluated after dehydration and clearance.

## Statistical methods

R software (version 4.2.1) and GraphPad Prism 8.0 were employed for statistical analysis and graphical visualization of the data. The Pearson or Spearman coefficients were calculated to determine the correlation between variables. A *P* value less than 0.05 was considered statistically significant for all statistical calculations.

## Availability of data and materials

The original datasets analyzed in this study are publicly available through the following repositories: The Cancer Genome Atlas (<https://tcga-data.nci.nih.gov/>), Genotype-Tissue Expression project (<https://www.gtexportal.org/home/index.html>), and NCBI Gene Expression Omnibus (<https://www.ncbi.nlm.nih.gov/gds/>). Further inquiries can be directed to the corresponding authors.

## RESULTS

### scRNA-seq analysis of the tumor microenvironment

We constructed a comprehensive tumor ecosystem map for esophageal tumor using Seurat, facilitating cell classification and identification of marker genes. The visualization of the results was accomplished through the application of the Uniform Manifold Approximation and Projection (UMAP) method, revealing 8 distinct clusters (Figure 1A). We observed non-immune cells in the clusters, primarily fibroblasts (DCN and COL1A1), myofibroblasts (MYH11 and ACTA2), endothelial cells (PECAM1 and PLVAP) and epithelial cells (KRT19 and KRT18). The immunocytes consisted of myeloid-derived cells (LYZ and CSF1R), T cells (CD3D and CD3E), B cells (CD19 and CD79A), and plasma cells (JCHAIN and MZB1) (Figure 1B). These cells are present in the esophagus of both normal and tumor patients. We observed substantial heterogeneity in the composition of cell types in normal and tumors. Among non-immune cells, tumors have more epithelial cells than normal, which may be because the cellular composition in tumors is mainly epithelioid tumor cells. Relatively, normal has more fibroblast and endothelial

cell composition (Figure 1A). This suggests that in the tumor microenvironment, non-immune cells may have a key influence on tumor growth and development. Previous studies have shown that activating specific tumor-associated genes in non-immune healthy cells surrounding the tumor can induce non-apoptotic programmed cell death in tumor cells [15].

We then examined the infiltration of immune cells and found no significant difference in the infiltration of T cells and B cells between normal and tumor tissues. However, myeloid cells showed a significant increase in tumors, while plasma cells exhibited a significant decrease (Figure 1C). Tumors possess a complex ecosystem in which heterogeneous malignant cells interact with immune and non-immune cells, shaping a complex cellular network in the tumor microenvironment (TME) [16]. Myeloid cells are an important component of the immune cells infiltrating tumors and play a crucial role in regulating tumor inflammation and angiogenesis [17, 18]. Persistent inflammation, such as that which occurs in cancer, disrupts normal bone marrow cell production, leading to the generation of immunosuppressive bone marrow-derived cells, such as myeloid-derived suppressor cells (MDSCs) and tumor-associated macrophages (TAMs). CD38-expressing bone marrow-derived suppressor cells promote tumor growth in an esophageal cancer mouse model [19, 20]. Therefore, an increase in infiltration of myeloid cells may indicate poor prognosis in esophageal cancer. In the tumor microenvironment, tumor-infiltrating B cells (TIL-B) can be identified based on their expression of CD19 or CD20. Several studies have correlated the effect of TIL-B on patient outcomes, revealing a heterogeneous effect based on specific tumor anatomic site, histology, and molecular subgroup [21–25]. In many clinical and human studies, high expression of B-cell markers has been associated with significantly improved outcomes [26–28]. Therefore, the absence of plasma cells may suggest a poor prognosis in esophageal cancer.

### Heterogeneity of esophageal tumor cells

Esophageal tumor cells are epithelioid malignant cells. It is difficult to separate epithelial cells from malignant cells by traditional markers. Here, we use copyKAT to analyze the chromosome copy number variation (CNV) of epithelial cells and divide epithelial cells into diploid and aneuploid, through the heat map of chromosome copy number, we found that aneuploid has more chromosomal variation, so we defined polyploidy as esophageal tumor cells (Figure 2A). Research has shown that most CNVs are closely associated with complex diseases. If CNVs occur within or near tumor-associated gene sequences, they can activate oncogenes,

suppress tumor suppressor genes, and ultimately contribute to tumor development [29, 30]. CNVs affect gene expression, phenotype differences, and phenotypic adaptation by altering gene dosage and regulating gene activity, leading to the development of tumors and other genetic diseases [31–35].

We performed dimensionality reduction clustering of esophageal tumor epithelial cells using unsupervised clustering and visualized nine distinct clusters with the unified manifold approximation and projection (UMAP) method. We found that the distribution of tumor cells

across UMAPs is continuous, suggesting that these subpopulations may have continuity across the developmental lineage of tumor cells (Figure 2B). Through the distribution ratio of each subgroup, we found that cluster 0 has the most proportional distribution, which suggests that cluster 0 may have an important position in esophageal tumor cells (Figure 2C). Then, we predicted the relative differentiation state of cells by cytoTRACE for each subcluster, cluster 0 had the highest differentiation prediction score, and the results indicated that cluster 0 might be the starting point of all cells in the cell developmental trajectory (Figure 2D).

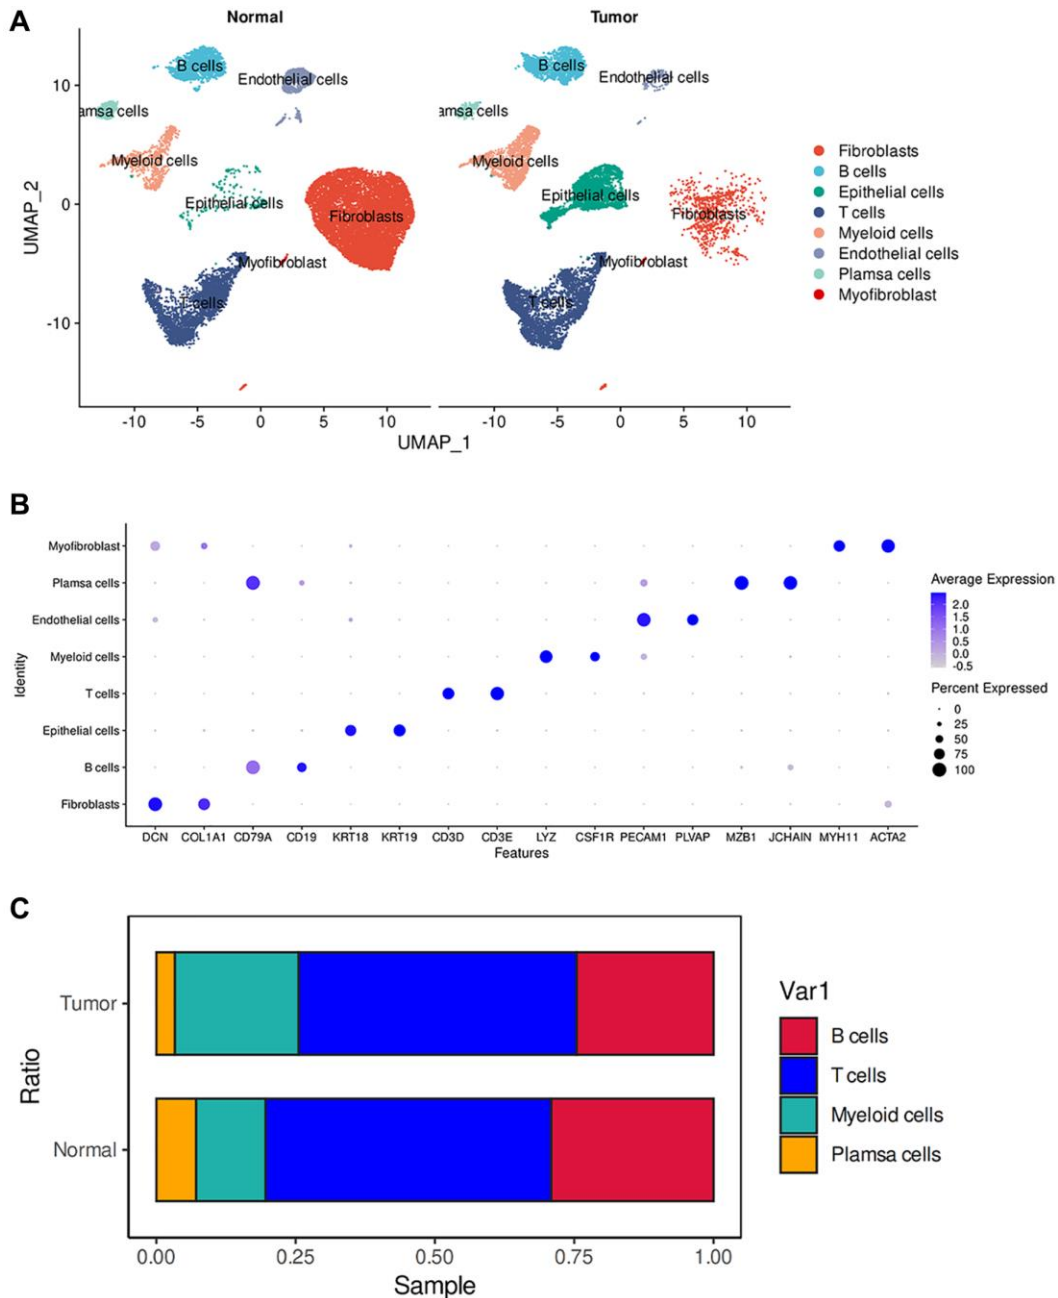

**Figure 1. scRNA-seq analysis of the tumor microenvironment in esophageal cancer cells. (A)** The UMAP plot displays the cellular composition of the esophageal tumor microenvironment. **(B)** Dotplot showing marker gene expression in indicated cell types. **(C)** Histograms indicating the proportion of cells in tumor tissue and normal tissue.

## The developmental trajectory of esophageal tumor cells

In order to better explore the developmental trajectory of esophageal tumor cells, we performed a pseudo-time analysis of esophageal tumor cells using Monocle2. We visualized the distribution of each cell cluster in pseudo-time via density plots and found that cluster 0 was predominantly distributed in the early stages of pseudo-time (Figure 3A). The branching tree showed that these cell clusters did not branch on the developmental lineage, suggesting that these cell clusters had developmental continuity, which was consistent with our analysis (Figure 3B, 3C).

Furthermore, we conducted Gene Ontology (GO) analysis on the pseudo-temporal genes. The results indicate that in the early pseudo-temporal stage, metabolic pathways such as unsaturated fatty acid metabolic process and icosaoid metabolic process are enriched, suggesting that cluster 0 exhibits higher metabolic activity. The enrichment of

pathways like negative regulation of T cell proliferation in the late pseudo-temporal stage suggests that tumor development and maturation are associated with an immunosuppressive effect involving the inhibition of T cell differentiation (Figure 3D). FABP5, a fatty acid binding protein, plays a role in fatty acid uptake, transport, and metabolism, suggesting that cluster 0 distributed in the early pseudo-time may have higher fatty acid metabolism to generate energy for proliferation and development. The role of altered fatty acid metabolism in cancer has garnered renewed interest due to their dual roles as structural components of the membrane matrix, important secondary messengers, and fuel sources for energy production [36–39]. Experimental evidence suggests that fatty acid metabolism has profound effects on the cancer epigenome, which in turn regulates gene expression and cellular differentiation [40–42]. According to relevant literature reports, FABP5 can reprogram the fatty acid metabolism of tumors to promote tumor growth [43–47], although there is limited research on FABP5 in

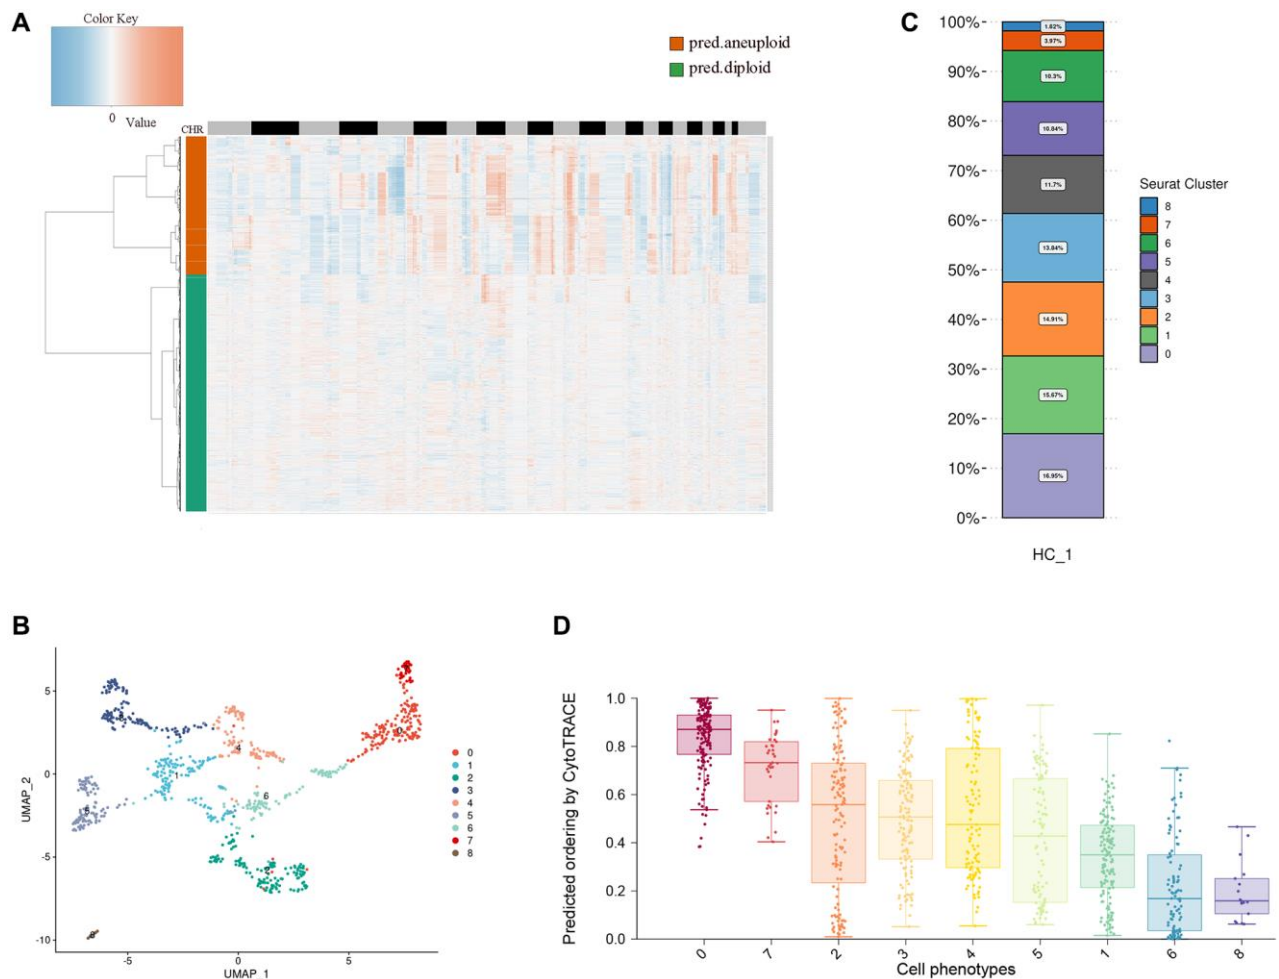

**Figure 2. Heterogeneity of esophageal tumor cells.** (A) Heatmap showing the differences in chromosomal copy numbers within the epithelial cells. (B) UMAP plot showing the subtypes of tumor cells. (C) Histograms indicating the proportions of each tumor subgroup. (D) Boxplot showing cellular differentiation potential of each tumor subgroup.

esophageal cancer. This suggests that FABP5 may serve as a potential diagnostic marker and therapeutic target. CEACAM6 belongs to the carcinoembryonic antigen gene family [48, 49], and increasing evidence shows that CEACAM6 participates in multiple aspects of tumor development, including promoting tumor invasion and metastasis, inhibiting tumor cell apoptosis, promoting tumor angiogenesis, and suppressing tumor cell adhesion [50–52]. AGR2 is expressed in various solid tumors [53–56]. AGR2 can affect cell signaling and metabolism by upregulating the expression of CCAAT-enhancer-binding protein  $\beta$  and the transcription factor hypoxia-inducible factor 2 $\alpha$  subunit, thereby promoting tumor development [53]. Similarly, multiple studies have shown that TFF3 [57–59] and NELL2 [60] are significantly upregulated in tumor tissue compared to adjacent normal tissue, promoting tumor migration, growth, and leading to poor prognosis. These findings suggest that FABP5, CEACAM6, AGR2, TFF3, and NELL2 are highly expressed in cluster 0 and promote tumor development. The results of the appeal show that cluster 0 may be the precursor cells of these cell clusters, and store energy through higher fatty acid metabolism, providing an energy basis for subsequent differentiation, proliferation, migration

and survival, which reflects the importance of cluster 0, so we will focus on the 0 cluster later.

### FABP6+ tumor cells play an important role in the progression of esophageal tumor

To further explore the gene signature of cluster 0, we visualized differential genes between normal epithelial cells and cluster 0. Results showed that compared to normal epithelial cells, cluster 0 highly expressed FABP6, which has similar functions to FABP5, including the uptake, transport, and metabolism of fatty acids (Figure 4A). We analyzed the expression of FABP6 in normal esophageal tissue and esophageal tumor tissue through the TCGA and GTEx database and found that esophageal tumor tissue had a higher expression level (Figure 4B). Further survival analysis of FABP6 revealed that patients with high expression of FABP6 had poorer survival (Figure 4C). To explore the regulatory mechanism of cluster 0, we analyzed the activity of transcription factors and found that MYC and TAF7 were significantly enriched in cluster 0 (Figure 4D). These findings suggest that FABP6 may play a critical role in the development of esophageal tumors and that MYC and TAF7 may be involved in the

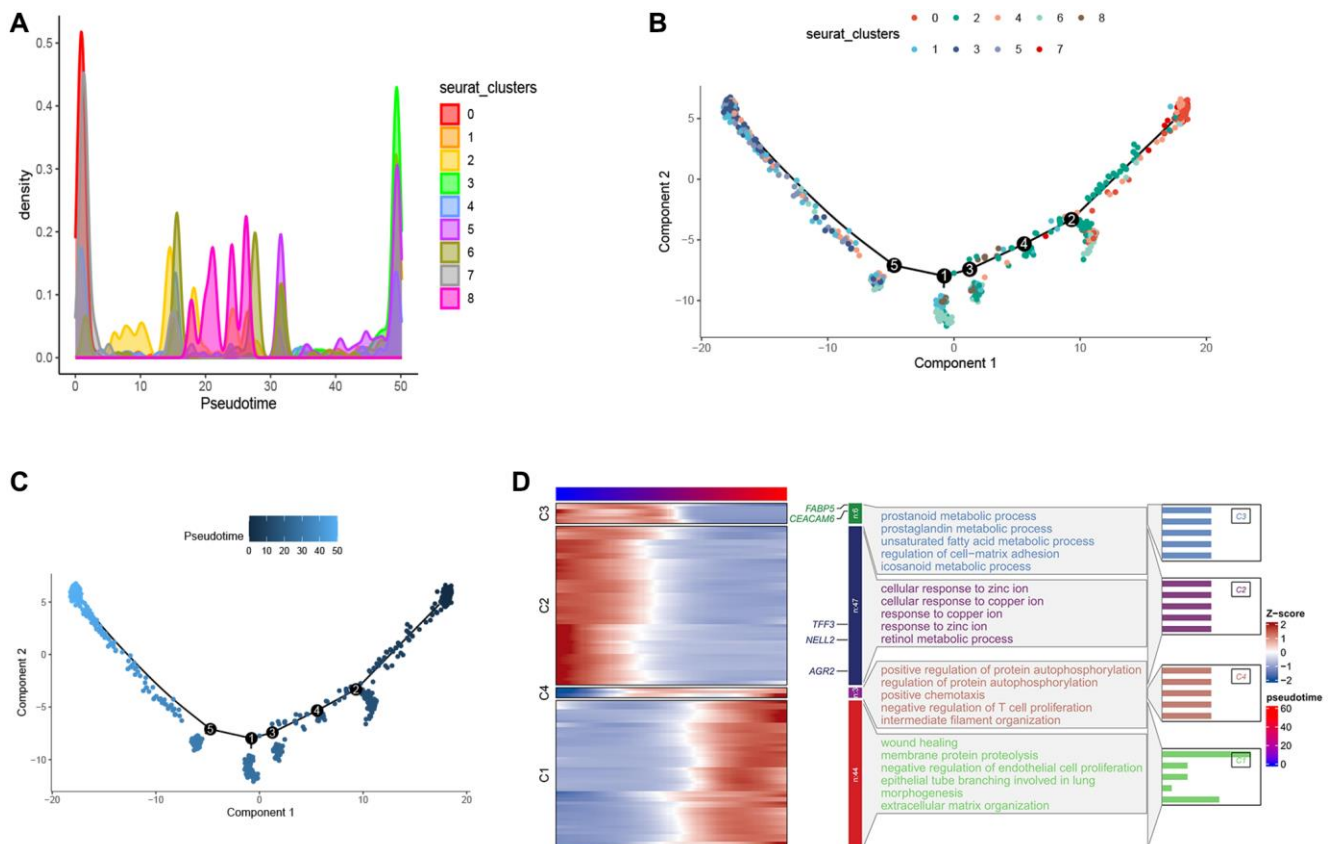

**Figure 3. Pseudo-time series analysis of esophageal cancer cells. (A)** Density map provides a visual representation of the distribution of tumor cell subtypes across a pseudo-time series. **(B, C)** Pseudo-time-ordered analysis of tumor cells. Tumor cell subtypes are labeled by colors. **(D)** Heatmap showing the dynamic changes in the expression of developmental genes over pseudo-time.



regulatory mechanism of cluster 0. The MYC oncogene is a member of a superfamily of genes whose products are frequently activated in human cancers [61–63]. MYC is a master regulator of multiple biological programs and primarily functions as a transcription factor that regulates the expression of thousands of genes, either directly or indirectly [64, 65]. Reports suggest that MYC overexpression can cause tumorigenesis, contributing to many of the hallmarks of cancer, including proliferation, self-renewal, cell survival, genomic instability, metabolism, invasiveness, angiogenesis, and remodeling of the tumor micro-environment [66–70]. These findings suggest that MYC may play a key role in the development and progression of esophageal tumors and may be involved in the regulatory mechanism of cluster 0. TAF7, short for TATA box-binding protein associated factor 7, is a key protein involved in transcriptional regulation processes [71]. TAF7 may play an important role in cancer, as evidenced by a study of breast cancer that found

significantly increased expression levels of TAF7 in tumor tissue, which was correlated with the invasive and metastatic potential of breast cancer [72]. Additionally, other studies have found abnormal expression of TAF7 in various types of cancer, including gliomas and lung adenocarcinomas [73–75]. These findings suggest that TAF7 may be involved in the development and progression of esophageal tumors and may be a potential therapeutic target.

In addition, we performed pathway enrichment analysis on cluster 0 using PROGENY to further explore the activated signaling pathways of cluster 0 (Figure 4E). Our study found that the MAPK pathway was significantly enriched in cluster 0. MAPK pathways are cascades of three kinases, where the most upstream kinase (MAPKKK) responds to various extra- and intracellular signals and activates the middle kinase (MAPKK) by direct phosphorylation. MAPKKs exclusively phosphorylate and activate a MAPK, which

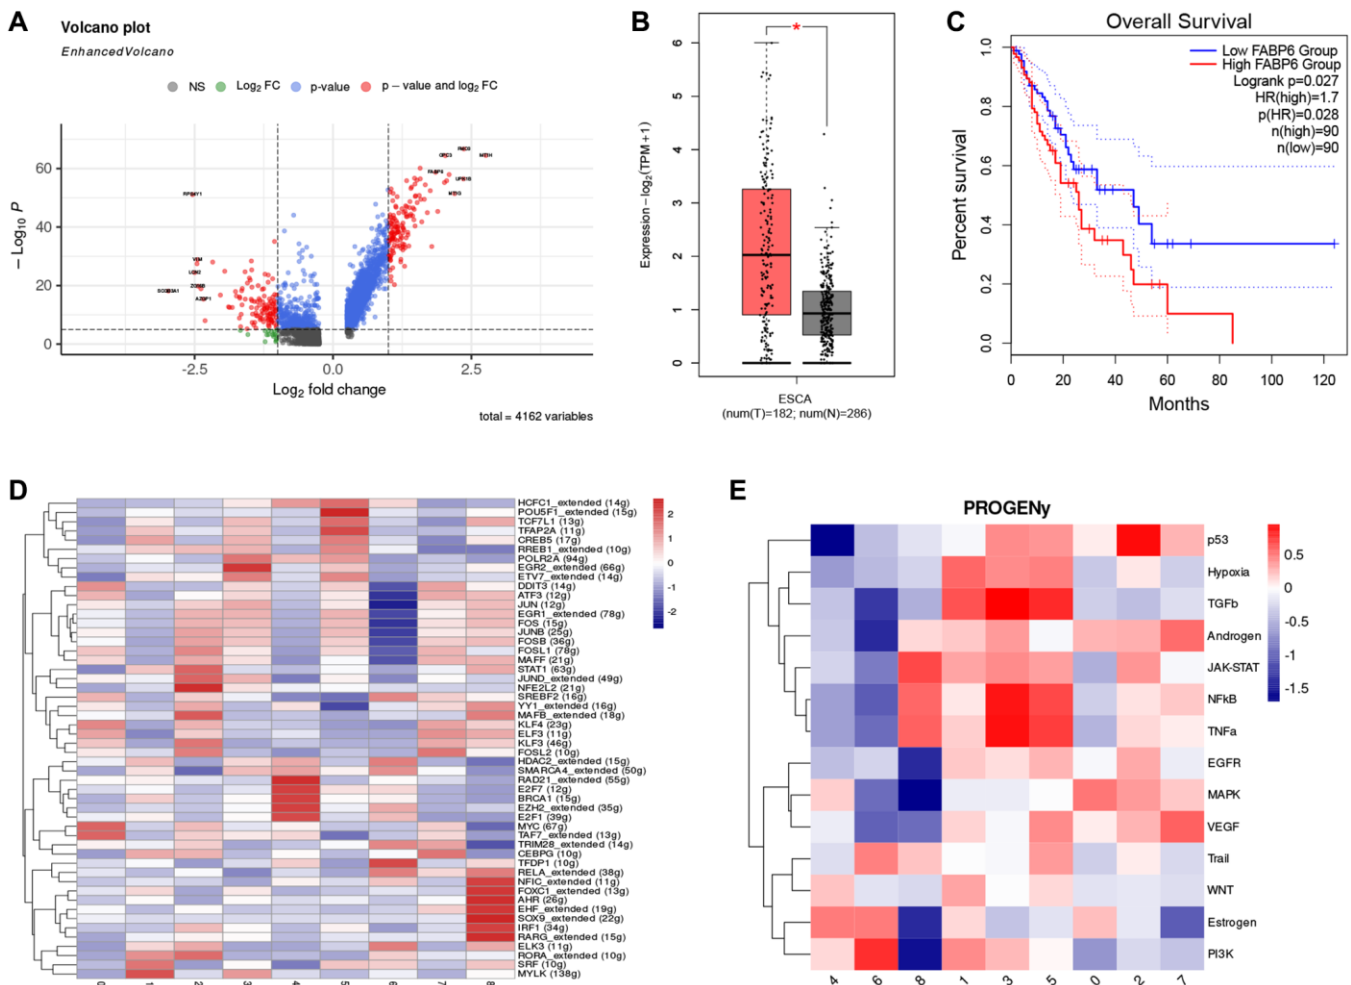

**Figure 4. FABP6 plays an important role in esophageal cancer.** (A) Volcano plot illustrates the differentially expressed genes between Cluster 0 and normal epithelial cells. (B) Boxplot displays the expression levels of FABP6 in esophageal cancer and normal esophageal tissues within the TCGA and GTEx database. (C) Survival analysis of FABP6 in the TCGA database. (D) Heatmap showing tumor cell transcription factor activity. (E) Heatmap showing the enrichment of 14 tumor-associated signaling pathways.

typically has many substrates that execute specific cell fate decisions appropriate to the input signal [76]. Over 85% of cancers exhibit hyperactive MAPK signaling, which is directly caused by genetic alterations of its upstream activators or components, including RTKs, Ras, and BRAF, or indirectly by those independent of Ras or RAF [77–79]. This hyperactivity significantly promotes disease progression [80]. These findings suggest that the MAPK pathway may play a critical role in the development and progression of esophageal tumors, and targeting this pathway may be a potential therapeutic strategy for cluster 0. After conducting these analyses, we have defined cluster 0 as FABP6+ tumor cells. This designation is based on the observed expression of FABP6 in this particular cluster. By identifying FABP6 as a defining marker, we can distinguish and categorize cluster 0 as a specific subset of tumor cells within the tumor microenvironment. This characterization provides valuable insights into the heterogeneity of tumor cells and may contribute to a deeper understanding of their functional roles and potential therapeutic implications.

### **Infiltration of T cells in esophageal tumor**

T cells play a crucial role in the tumor microenvironment, and different subsets of T cells perform distinct functions. T cells can be divided into helper T cells (CD4+ T cells) and cytotoxic T cells (CD8+ T cells). Helper T cells can be further classified into subgroups such as Th1, Th2, Th17, and Treg, all of which play important roles in immune regulation [81–86]. Th1 cells, characterized by the expression of interferon (IFN)- $\gamma$  lineage cytokine and the master transcription factor T-bet, participate in type 1 immune responses to intracellular pathogens such as mycobacterial species and viruses [82]. Th2 cells, characterized by the expression of interleukin (IL)-4/IL-5/IL-13 lineage cytokines and the master transcription factor GATA3, participate in type 2 immune responses to larger extracellular pathogens such as helminths [84]. Th17 cells, characterized by the expression of IL-17/IL-22 lineage cytokines and the master transcription factor ROR $\gamma$ t, participate in type 3 immune responses to extracellular pathogens including some bacteria and fungi [85]. On the other hand, Treg cells regulate immune responses to maintain immune cell homeostasis and prevent immunopathology, rather than exerting effector functions like Th1/Th2/Th17 cells [86, 87]. The function of cytotoxic T cells (CD8+ T cells) is to directly kill pathogen-infected and tumor cells [83]. By recognizing and killing target cells, CD8+ T cells play an important role in immune clearance [88].

To investigate the infiltration of T cells in the microenvironment of esophageal tumors, we undertook a

further classification of T cells into five distinct subgroups using unsupervised clustering techniques (Figure 5A). Among these subgroups, CD8+ effector T cells (CD8+ Teff) displayed heightened expression of NKG7, CD8A, and CD8B; NK T cells exhibited increased expression of KLRD1, GNLY, and FCER1G; Exhausted T cells (Exhaust T) demonstrated elevated expression of PDCD1 (PD-1); T regulatory cells (Treg) displayed enhanced expression of FOXP3 and IL2RA; Naive T cells (Naive T) exhibited pronounced levels of TCF7 and CCR7. These findings align with previous literature reports (Figure 5B). We conducted an analysis of T cell infiltration by assessing the ratio of T cells, which revealed a substantial augmentation in Treg infiltration and a notable reduction in CD8+ effector T cells (CD8+ Teff) within tumor tissues, in comparison to normal tissues (Figure 5C).

Regulatory T cells (Tregs) are categorized into two distinct types: natural/thymic Tregs and peripherally induced Tregs, depending on their site of development. FOXP3+ natural Tregs are generated within the thymus and represent a functionally mature subset of T cells that are specialized in immune suppression (referred to as natural/thymic Tregs) [89–91]. The infiltration of Treg cells within tumors is closely associated with tumor development and prognosis. High levels of Treg cell infiltration have been correlated with tumor growth, invasion, and metastasis [92–94]. Studies have indicated that alterations in the quantity and functionality of Treg cells can result in immune tolerance, thereby enhancing the ability of tumor cells to evade immune surveillance [95, 96]. Consequently, the inhibition or modulation of Treg cell function has become an important strategy in cancer immunotherapy [97]. Effector T cells play a crucial role in tumor immunity. Specifically, effector T cells first recognize tumor-specific antigens (which can be proteins abnormally expressed by tumor cells, neoantigens generated by mutations, or overexpressed antigens) and subsequently become activated to initiate their cytotoxic mode [98]. Activated effector T cells undergo proliferation, differentiation, and functional regulation, releasing cytotoxic agents and pro-inflammatory cytokines that directly induce tumor cell apoptosis [99–101]. However, tumor cells can employ various mechanisms to evade and resist the attacks of effector T cells. They can reduce the expression of tumor antigens, produce immune inhibitory molecules (such as PD-L1) [102], and recruit immunosuppressive cells (such as Treg cells) [92–94], thereby attenuating the cytotoxic capabilities of effector T cells.

Notably, we did not detect a substantial difference in the infiltration of exhausted T cells (Exhaust T) between the two groups. This observation indicates that the modification in T cell composition within tumor tissues

predominantly entails a specific reconfiguration in the equilibrium between Treg and CD8+ effector T cells, while exhausted T cells exhibit relatively minimal variation (Figure 5C). The principle of PD-L1 therapy for cancer involves the utilization of anti-PD-L1 antibodies or PD-1 antibodies to block the PD-1/PD-L1 signaling pathway. This blockade aims to alleviate the inhibitory effect of tumors on immune cells, restore immune cell activity, and enhance their ability to attack tumors [103, 104]. This observation indicates that the effectiveness of PD-1 may not be prominent in the case of esophageal tumors since there was no substantial alteration in the infiltration of exhausted T cells (Exhaust T), which are typically associated with PD-1 expression, between tumor and normal tissues. These findings suggest that other factors or mechanisms might exert greater influence on the immune response and tumor microenvironment in esophageal tumors. Further

investigations are necessary to comprehensively comprehend the underlying factors that contribute to the immune response in this specific context.

### Cellular communication between T cells and FABP6+ tumor cells

To gain further insights into the cellular interactions between FABP6+ tumor cells and T cells, we employed CellChat, an analysis tool, to investigate the communication patterns between FABP6+ tumor cells and T cells, with normal epithelial cells paired with T cells serving as a control group. By utilizing CellChat, our aim was to uncover the specific signaling pathways and communication networks that play a role in the crosstalk between these cell populations. Comparing to normal tissues, we observed that in tumor tissues, both the number and intensity of cell communication events

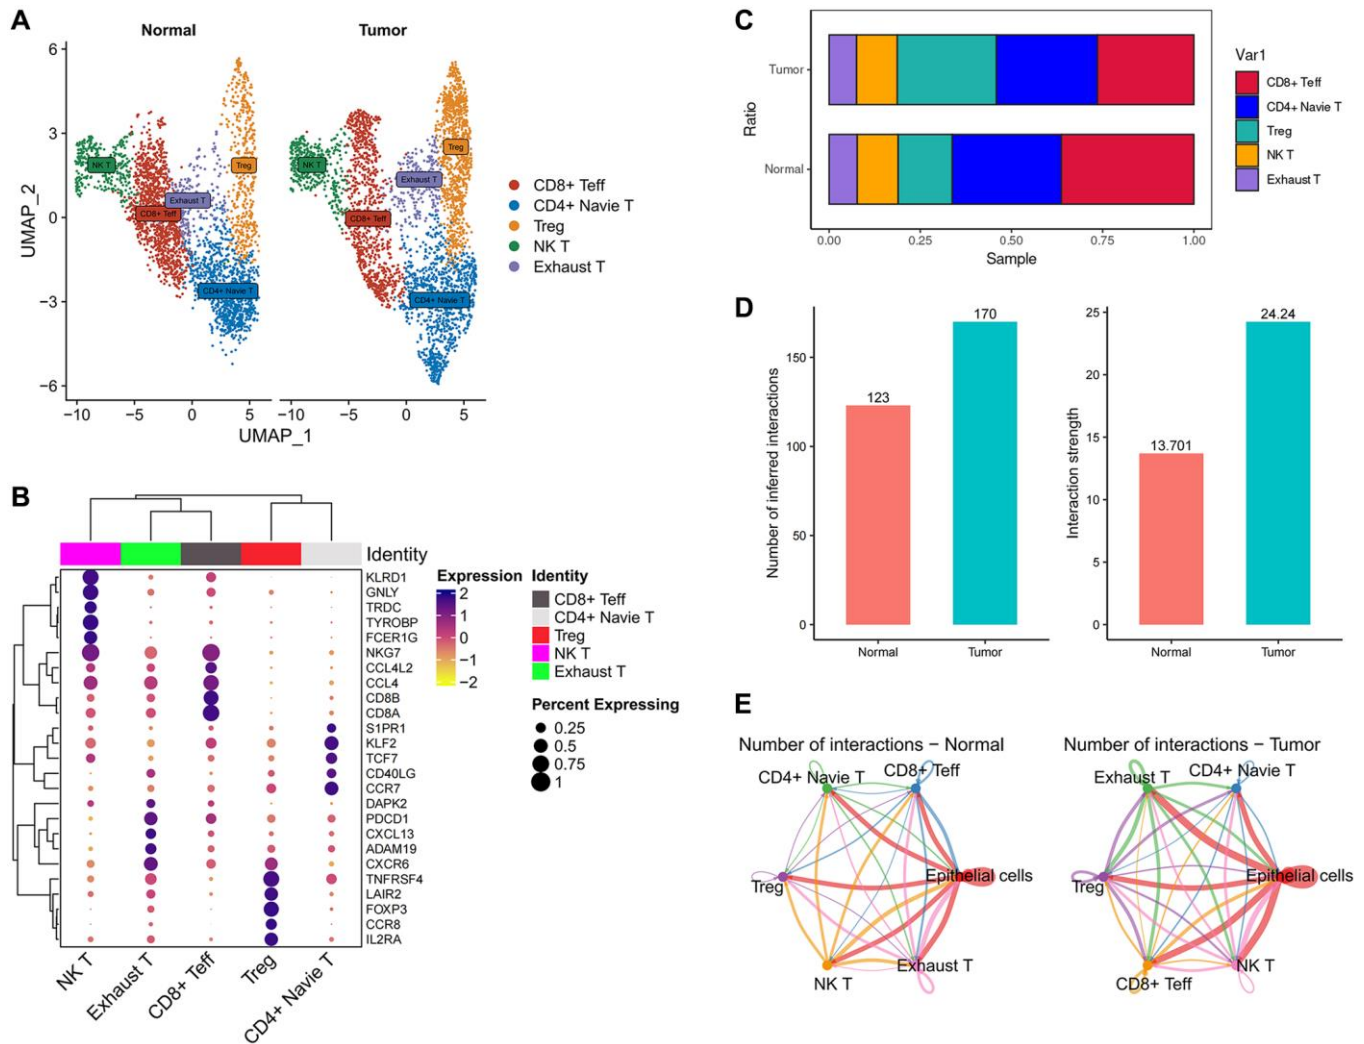

**Figure 5. The immune landscape of T cells in esophageal cancer. (A)** UMAP plot showing the subtypes of T cells. **(B)** Dot plot showing marker gene expression in indicated cell types. **(C)** Histograms indicating the proportion of T cells subtypes in tumor tissue and normal tissue. **(D)** Histograms indicating the cellular communication strength and quantity in tumor tissue and normal tissue. **(E)** Cell-Chat reveals possible cell-to-cell interactions.



between different cell populations were higher (Figure 5D). This suggests that the tumor microenvironment fosters increased cellular communication, potentially indicating more complex and active intercellular signaling networks within the tumor tissue. Our analysis revealed that both normal epithelial cells and FABP6+ tumor cells within the tumor tissue exhibited cellular interactions with various subtypes of T cells. This indicates that there is cellular communication between these cell populations, regardless of whether they originate from normal tissue or FABP6+ tumor cells within the tumor (Figure 5E).

We proceeded to analyze the cellular communication output signal patterns of these cells. Interestingly, we observed a significant decrease in the CXCL-related

pathway in FABP6+ tumor cells compared to normal tissues (Figure 6A). The CXCL family of cytokines plays a crucial role in tumor metastasis and invasion. Cytokines such as CXCL8, CXCL9, and CXCL10 are capable of attracting and activating immune cells, including macrophages and lymphocytes, causing their accumulation around the tumor. Through the release of substances that can dissolve tumor cells, these immune cells can limit the spread and dissemination of the tumor [105–107]. CXCL9 and CXCL10, by binding to their receptor CXCR, can attract and activate anti-tumor immune cells such as CD8+ T cells and natural killer (NK) cells, thereby enhancing their ability to eliminate tumor cells [108, 109]. Compared to FABP6+ tumor cells, normal tissues were found to lack the MIF-related pathway in our analysis of cellular communication

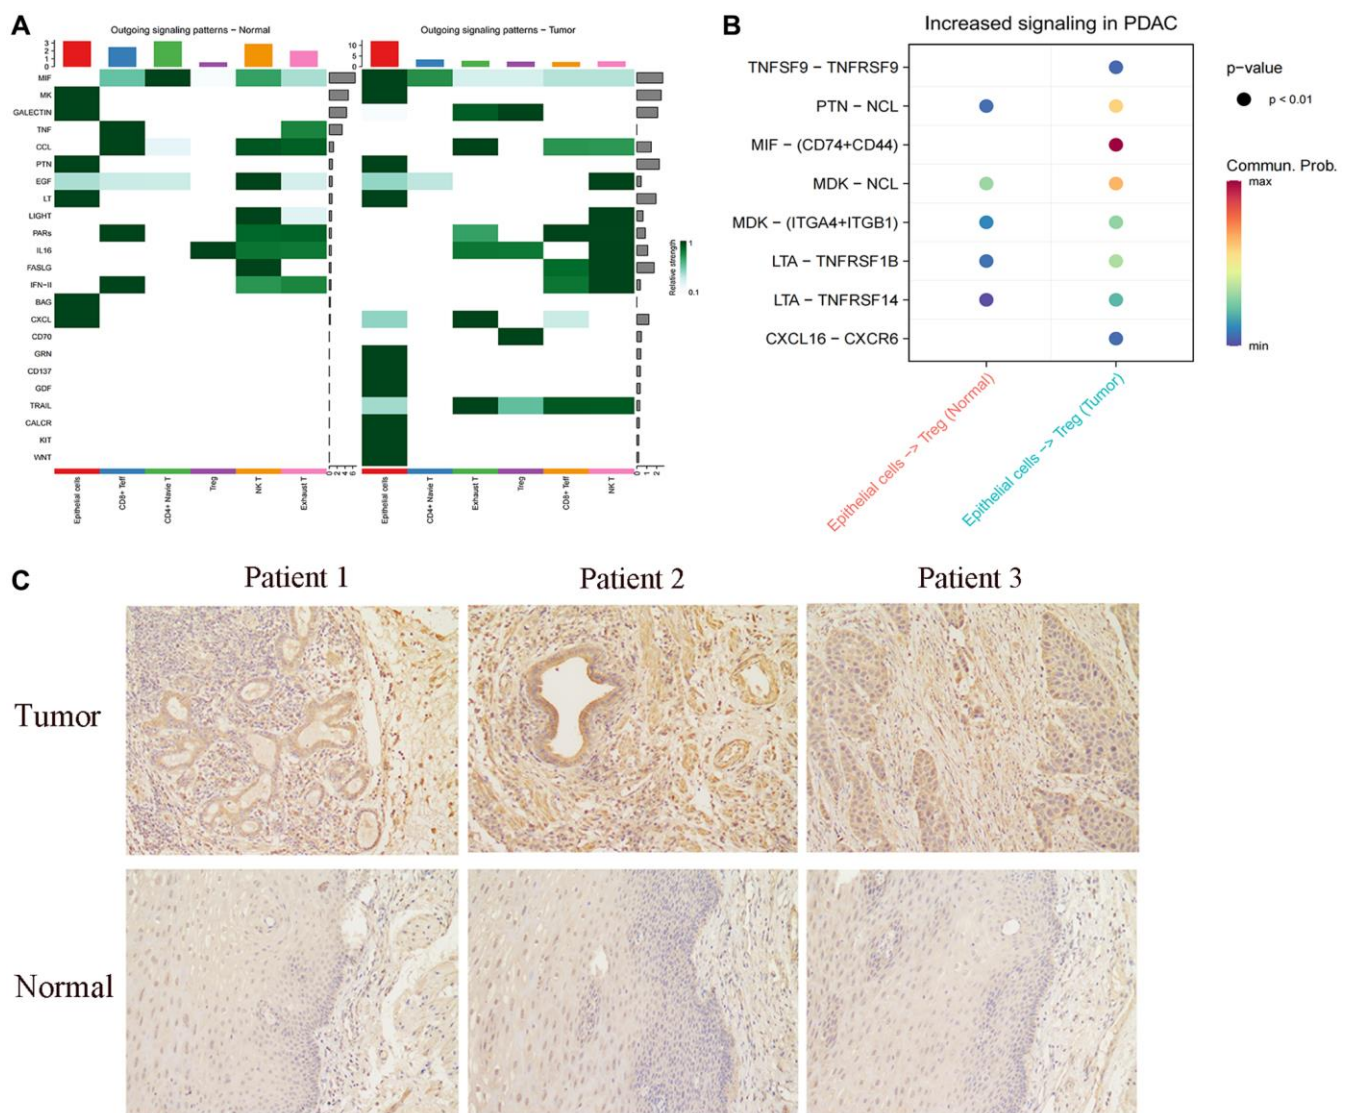

**Figure 6. Cellular communication between FABP6+ esophageal cancer cells and normal epithelium and T cells.** (A) Heatmap showing the cellular communication signal output patterns. (B) Heatmap showing the ligand-receptor. (C) Immunohistochemistry staining statistics results for normal esophageal tissues and ESCA tissues. Scale bar: 50  $\mu$ m. (\* $p < 0.05$ , \*\* $p < 0.01$ , \*\*\* $p < 0.001$ , ns indicates no statistical significance).



output signal patterns. This suggests that the communication signals involving MIF may be absent or downregulated in normal tissues. The differential presence or absence of the MIF-related pathway between FABP6+ tumor cells and normal tissues highlights a potential role of MIF signaling in the tumorigenic processes associated with FABP6+ tumor cells. In order to further explore the specific receptors involved in the MIF pathway in FABP6+ tumor cells, we conducted an analysis and found a significant enrichment of CD74 and CD44 receptors in the tumor tissue (Figure 6B). MIF, CD74, and CD44 exhibit interplay and mutual regulation mechanisms in tumor development and progression. In addition to its expression in immune cells, CD74 is overexpressed in various tumor types and can form a complex with MIF, thereby modulating MIF's function [110–112]. The interaction between MIF and CD74 can enhance the stability and biological activity of MIF, influencing tumor development and progression [113]. CD44, a cell surface molecule, is widely expressed in multiple cell types, including tumor cells. Elevated expression of CD44 in tumors is associated with characteristics of tumor stem cells, cell migration, and infiltration processes [114–117]. CD44 in tumors may interact with MIF and CD74, participating in the regulation of related signaling pathways [118–121]. Specifically, MIF can activate downstream signaling pathways such as MAPK (Mitogen-Activated Protein Kinase) and PI3K (Phosphoinositide 3-Kinase) by binding to CD74, promoting tumor cell proliferation, survival, and metastasis [113, 121]. Furthermore, the high expression of CD74 can also impact the expression and function of CD44. The interaction between CD74 and CD44 may influence tumor cell behavior through the regulation of cell-matrix interactions, cell adhesion, migration, and infiltration pathways [119, 120]. Existing studies have found that, TGF- $\beta$  expressing B lymphocytes assembled into clusters and engaged with T cells through lymphocytic recruitment signals (SELL, CXCL13, CCL4, CD74), while interacting with regulatory T cells via CD47:SIRP- $\gamma$  and FOXP3 promoting Galectin-9:CD44 pathways. This suggests that FABP6+ tumor cells may utilize CD74 to interact with CD44 on Treg cells, potentially promoting the immunosuppressive function of Treg cells and facilitating tumor development. This observation highlights the potential role of the CD74-CD44 interaction in modulating immune responses within the tumor microenvironment and provides insights into the mechanisms underlying immune evasion and tumor progression.

To further explore FABP6 expression in ESCA, we used IHC to detect FABP6 expression at the protein level. IHC staining for FABP6 was negative in normal esophageal specimens and positive in ESCA specimens

(Figure 6C). Thus, we hypothesized that FABP6 is an unfavorable prognostic biomarker in ESCA cancer.

### **The migratory potential of ESCA cells is observed to be inhibited upon knockdown of FABP6**

To elucidate the role of FABP6 in ESCA, we initially selected ECA109 and KYSE30 cell lines based on western blotting tests to establish si-FABP6 cell lines (Figure 7A). Subsequently, we quantified FABP6 protein levels using RT-PCR and protein blotting techniques (Figure 7B–7D). Furthermore, we conducted wound-healing and transwell assays to investigate the impact of FABP6 expression on cell migration and invasion in ESCA (Figure 7E, 7G, 7I, 7K). Our results demonstrated that FABP6 knockdown significantly reduced the migration potential of ECA109 and KYSE30 cell lines (Figure 7F, 7H, 7J, 7L). In conclusion, our findings suggest that FABP6 may expedite the development of ESCA by augmenting the migratory potential of cells.

### **Visualization of co-expression of FABP6 and FOXP3**

In our preceding investigation, we conducted exploratory analysis utilizing single-cell data from esophageal carcinoma, revealing a regulatory influence of FABP6 on Treg cells, demonstrating a positive correlation. To validate this regulatory relationship, we employed immunofluorescence techniques to ascertain the expression dynamics between FABP6 and the marker gene FOXP3 in Treg cells. The observed upregulation of FABP6 was associated with a notable enhancement in Treg cell proliferation, concurrently promoting heightened expression levels of FOXP3 (Figure 8).

## **DISCUSSION**

The results of the study provide valuable insights into the tumor microenvironment in primary esophageal tumors, specifically focusing on the characterization of cell types, the heterogeneity of esophageal tumor cells, the role of FABP6+ tumor cells, the infiltration of T cells, and the cellular communication between T cells and FABP6+ tumor cells.

Firstly, the scRNA-seq analysis identified distinct clusters of cells within the tumor microenvironment, including non-immune cells such as fibroblasts, myofibroblasts, endothelial cells, and epithelial cells, as well as immunocytes such as myeloid-derived cells, T cells, B cells, and plasma cells. The observation of substantial heterogeneity in the composition of cell types in normal and tumor tissues suggests the importance of non-immune cells in tumor growth and

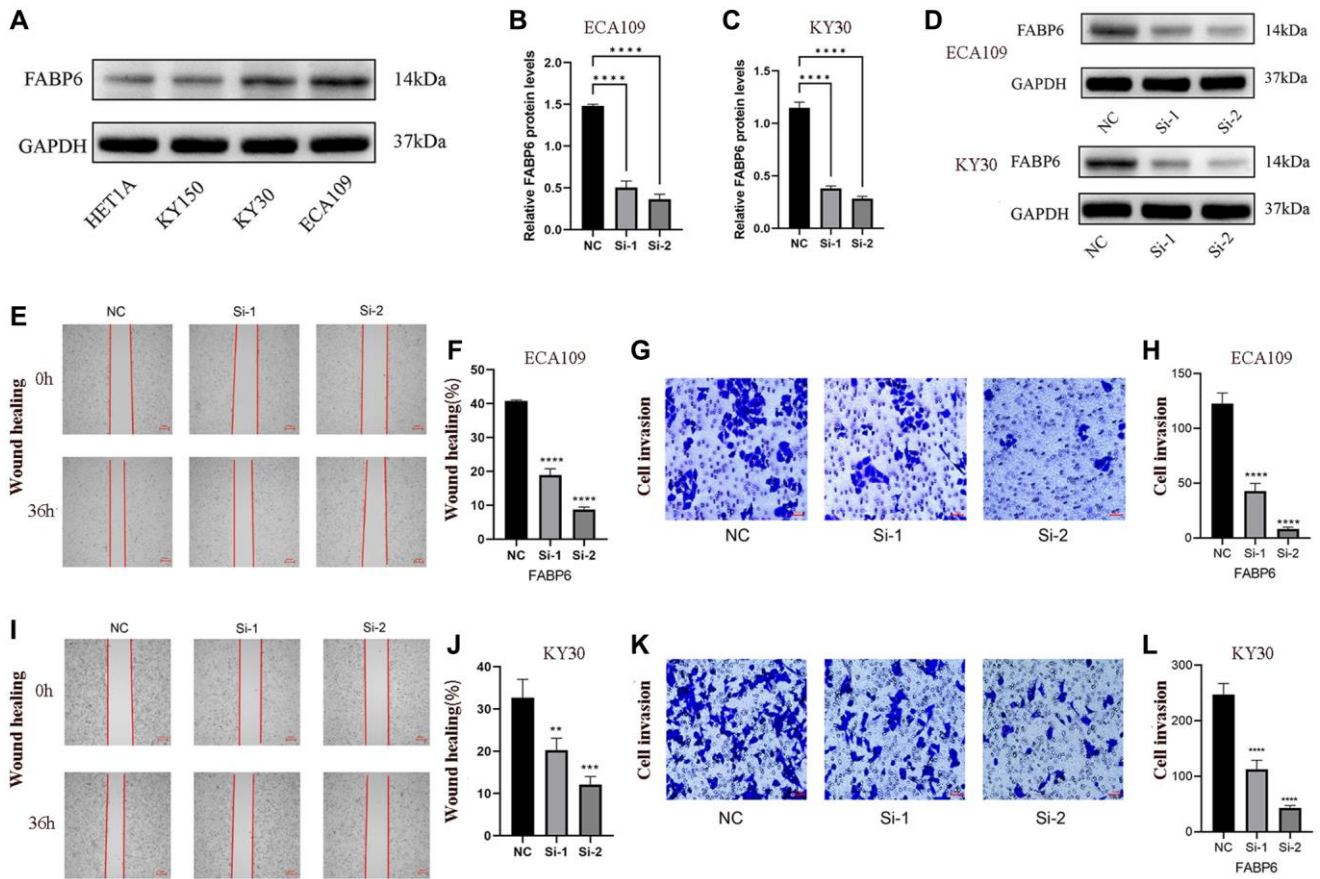

**Figure 7. Displays the experimental verification of our study.** (A) showcases the expression of FABP6 in diverse esophageal cancer cell lines, providing evidence of FABP6's promotion of migratory capability in ESCA cells. (B–D) present the results obtained from qPCR and Western blotting analyses, which demonstrated the successful silencing of FABP6 expression in the ECA-109 and KYSE30 cell lines using siRNA. For the ECA109 cell line, Scratch wound-healing assays (E, F) and transwell migration healing assays (G, H) were conducted to evaluate the migration capability influenced by FABP6, accompanied by their respective statistical representations. Similarly, for the KYSE30 cell line, Scratch wound-healing assays (I, J) and transwell migration healing assays (K, L) were performed to assess migration ability regulated by FABP6, along with corresponding statistical illustrations. The scale bar for Figure 7E and 7I represent 250  $\mu$ m, while Figure 7G, 7K feature a scale bar of 50  $\mu$ m. Statistical analysis revealed significant differences between the groups ( $p < 0.05$ ,  $***p < 0.001$ ).

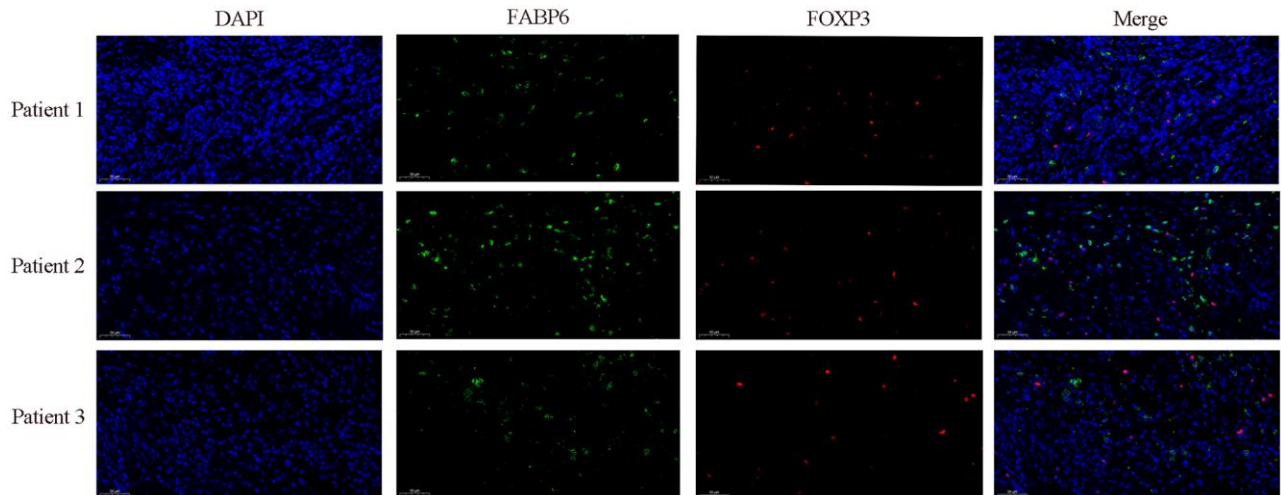

**Figure 8. Immunofluorescence staining further verified the relationship between FABP6 expression and Treg infiltration.** Immunofluorescence staining was performed on esophageal cancer specimens to examine FABP6 expression and Treg infiltration. The Treg lineage-specifying transcription factor FOXP3 served as a Treg marker. FABP6 (green), FOXP3 (red) and DAPI (blue) staining. Scale bar, 50  $\mu$ m.

development. Moreover, the infiltration of immune cells revealed an increase in myeloid cells and a decrease in plasma cells within tumor tissues, indicating potential immune cell dysregulation in the tumor micro-environment.

The heterogeneity of esophageal tumor cells was explored through copyKAT analysis, which identified a distinct subset of tumor cells referred to as cluster 0. This cluster exhibited higher chromosomal variation, suggesting a polyploid nature of esophageal tumor cells. The analysis further revealed a developmental lineage of tumor cells, with cluster 0 being positioned as the starting point of cell differentiation. Notably, cluster 0 showed higher expression of genes associated with fatty acid metabolism, indicating its potential role in energy generation for proliferation and development. This finding is supported by the literature, which suggests that reprogramming fatty acid metabolism can promote tumor growth.

FABP6, identified as a defining marker for cluster 0, was found to be highly expressed in these tumor cells compared to normal epithelial cells. The analysis of the TCGA database confirmed higher expression of FABP6 in esophageal tumor tissue, and patients with high FABP6 expression exhibited poorer survival. The enrichment of transcription factors MYC and TAF7 in cluster 0, along with pathway enrichment analysis, revealed the activation of the MAPK pathway in these FABP6+ tumor cells. These findings suggest the potential involvement of FABP6 in regulating fatty acid metabolism and signaling pathways related to tumor progression. Regarding T cell infiltration in esophageal tumors, the analysis identified distinct subsets of T cells, including CD8+ effector T cells, NK T cells, exhausted T cells, T regulatory cells (Tregs), and naive T cells. Comparing tumor and normal tissues, the infiltration of Tregs was significantly increased, while CD8+ effector T cells showed a significant decrease in tumor tissues. Interestingly, no significant change was observed in exhausted T cell infiltration, suggesting that the efficacy of PD-1 may not be significant in esophageal tumors. This indicates that other factors or mechanisms may play a more influential role in the immune response and tumor microenvironment of esophageal tumors.

The study also investigated the cellular communication between FABP6+ tumor cells and T cells. The analysis revealed increased communication events within tumor tissues, indicating a more complex intercellular signaling network in the tumor microenvironment. Both normal epithelial cells and FABP6+ tumor cells exhibited cellular interactions with various T cell subtypes, highlighting the presence of communication between these

cell populations. Differential signaling pathways, such as CXCL and MIF-related pathways, were observed between FABP6+ tumor cells and normal tissues. The enrichment of CD74 and CD44 receptors in the tumor tissue suggests the potential interaction between FABP6+ tumor cells and Treg cells, which may contribute to immunosuppression and tumor development. Some limitations exist, including the need for functional validation of the bioinformatics predictions. Future directions entail experimentally confirming the role of FABP6 in potentiating tumor growth, metastasis, and Treg recruitment. Animal models can elucidate the *in vivo* impact of targeting FABP6. Broader patient cohorts are required to validate FABP6 as a prognostic biomarker. Overall, this single-cell sequencing study sheds light on tumor heterogeneity and identifies FABP6 as a potential driver of esophageal carcinoma progression and immunotherapy resistance, meriting further investigation as both a predictive biomarker and therapeutic target.

## CONCLUSION

This study provides novel insights into the tumor microenvironment and heterogeneity of esophageal squamous cell carcinoma through comprehensive single-cell RNA sequencing analysis. Key findings demonstrate an enrichment of FABP6-expressing tumor cells with high fatty acid metabolism, alterations in T cell infiltration patterns, and increased cellular communication between FABP6+ tumor cells and Tregs. The characterization of tumor cell subpopulations reveals a precursor cluster with high FABP6 expression, MAPK pathway activation, and poor patient survival.

## AUTHOR CONTRIBUTIONS

D.F.Z. and F.C.Z. designed the study. D.F.Z. and P.F.G. downloaded and analyzed the data. D.F.Z., F.C.Z. and S.J.L. performed experiments. D.F.Z. and H.T.L. wrote the manuscript. S.J.L. and Z.R.L. revised the manuscript. The final manuscript has been approved by all authors.

## ACKNOWLEDGMENTS

We would like to acknowledge the reviewers for their helpful comments on this paper.

## CONFLICTS OF INTEREST

The authors declare that the research was conducted in the absence of any commercial or financial relationships that could be construed as a potential conflict of interest.



## ETHICAL STATEMENT AND CONSENT

This study was conducted in accordance with the Declaration of Helsinki and was approved by the Research Ethics Committee of the Second Hospital of Hebei Medical University (approval number: 2023-R-216). Written informed consent was obtained from all participants prior to their enrollment in this study. Participants were informed of their right to withdraw from the study at any time without consequence.

## FUNDING

This study was supported by Science and Technology Plan Project of Hebei Province (No. 223777106D) and Hebei Provincial Government sponsored the project of training excellent talents in clinical medicine (No. 303-2022-27-37).

## REFERENCES

1. Morgan E, Soerjomataram I, Rungay H, Coleman HG, Thrift AP, Vignat J, Laversanne M, Ferlay J, Arnold M. The Global Landscape of Esophageal Squamous Cell Carcinoma and Esophageal Adenocarcinoma Incidence and Mortality in 2020 and Projections to 2040: New Estimates From GLOBOCAN 2020. *Gastroenterology*. 2022; 163:649–58.e2. <https://doi.org/10.1053/j.gastro.2022.05.054> PMID:[35671803](https://pubmed.ncbi.nlm.nih.gov/35671803/)
2. Ferlay J, Colombet M, Soerjomataram I, Mathers C, Parkin DM, Piñeros M, Znaor A, Bray F. Estimating the global cancer incidence and mortality in 2018: GLOBOCAN sources and methods. *Int J Cancer*. 2019; 144:1941–53. <https://doi.org/10.1002/ijc.31937> PMID:[30350310](https://pubmed.ncbi.nlm.nih.gov/30350310/)
3. Allemani C, Matsuda T, Di Carlo V, Harewood R, Matz M, Nikšić M, Bonaventure A, Valkov M, Johnson CJ, Estève J, Ogunbiyi OJ, Azevedo E Silva G, Chen WQ, et al, and CONCORD Working Group. Global surveillance of trends in cancer survival 2000–14 (CONCORD-3): analysis of individual records for 37 513 025 patients diagnosed with one of 18 cancers from 322 population-based registries in 71 countries. *Lancet*. 2018; 391:1023–75. [https://doi.org/10.1016/S0140-6736\(17\)33326-3](https://doi.org/10.1016/S0140-6736(17)33326-3) PMID:[29395269](https://pubmed.ncbi.nlm.nih.gov/29395269/)
4. Zhou X, Ren T, Zan H, Hua C, Guo X. Novel Immune Checkpoints in Esophageal Cancer: From Biomarkers to Therapeutic Targets. *Front Immunol*. 2022; 13:864202. <https://doi.org/10.3389/fimmu.2022.864202> PMID:[35669786](https://pubmed.ncbi.nlm.nih.gov/35669786/)
5. Lin DC, Wang MR, Koeffler HP. Genomic and Epigenomic Aberrations in Esophageal Squamous Cell Carcinoma and Implications for Patients. *Gastroenterology*. 2018; 154:374–89. <https://doi.org/10.1053/j.gastro.2017.06.066> PMID:[28757263](https://pubmed.ncbi.nlm.nih.gov/28757263/)
6. Bai X, Li Y, Zeng X, Zhao Q, Zhang Z. Single-cell sequencing technology in tumor research. *Clin Chim Acta*. 2021; 518:101–9. <https://doi.org/10.1016/j.cca.2021.03.013> PMID:[33766554](https://pubmed.ncbi.nlm.nih.gov/33766554/)
7. Satija R, Farrell JA, Gennert D, Schier AF, Regev A. Spatial reconstruction of single-cell gene expression data. *Nat Biotechnol*. 2015; 33:495–502. <https://doi.org/10.1038/nbt.3192> PMID:[25867923](https://pubmed.ncbi.nlm.nih.gov/25867923/)
8. Jin S, Guerrero-Juarez CF, Zhang L, Chang I, Ramos R, Kuan CH, Myung P, Plikus MV, Nie Q. Inference and analysis of cell-cell communication using CellChat. *Nat Commun*. 2021; 12:1088. <https://doi.org/10.1038/s41467-021-21246-9> PMID:[33597522](https://pubmed.ncbi.nlm.nih.gov/33597522/)
9. Trapnell C, Cacchiarelli D, Grimsby J, Pokharel P, Li S, Morse M, Lennon NJ, Livak KJ, Mikkelsen TS, Rinn JL. The dynamics and regulators of cell fate decisions are revealed by pseudotemporal ordering of single cells. *Nat Biotechnol*. 2014; 32:381–6. <https://doi.org/10.1038/nbt.2859> PMID:[24658644](https://pubmed.ncbi.nlm.nih.gov/24658644/)
10. Browaeys R, Saelens W, Saeys Y. NicheNet: modeling intercellular communication by linking ligands to target genes. *Nat Methods*. 2020; 17:159–62. <https://doi.org/10.1038/s41592-019-0667-5> PMID:[31819264](https://pubmed.ncbi.nlm.nih.gov/31819264/)
11. Yu G, Wang LG, Han Y, He QY. clusterProfiler: an R package for comparing biological themes among gene clusters. *OMICS*. 2012; 16:284–7. <https://doi.org/10.1089/omi.2011.0118> PMID:[22455463](https://pubmed.ncbi.nlm.nih.gov/22455463/)
12. Liu B, Li C, Li Z, Wang D, Ren X, Zhang Z. An entropy-based metric for assessing the purity of single cell populations. *Nat Commun*. 2020; 11:3155. <https://doi.org/10.1038/s41467-020-16904-3> PMID:[32572028](https://pubmed.ncbi.nlm.nih.gov/32572028/)
13. Schubert M, Klinger B, Klünemann M, Sieber A, Uhlitz F, Sauer S, Garnett MJ, Blüthgen N, Saez-Rodriguez J. Perturbation-response genes reveal signaling footprints in cancer gene expression. *Nat Commun*. 2018; 9:20. <https://doi.org/10.1038/s41467-017-02391-6> PMID:[29295995](https://pubmed.ncbi.nlm.nih.gov/29295995/)
14. Aibar S, González-Blas CB, Moerman T, Huynh-Thu VA, Imrichova H, Hulselmans G, Rambow F, Marine JC, Geurts P, Aerts J, van den Oord J, Atak ZK, Wouters J,



- Aerts S. SCENIC: single-cell regulatory network inference and clustering. *Nat Methods*. 2017; 14:1083–6.  
<https://doi.org/10.1038/nmeth.4463>  
PMID:28991892
15. Moya IM, Castaldo SA, Van den Mooter L, Soheily S, Sansores-Garcia L, Jacobs J, Mannaerts I, Xie J, Verboven E, Hillen H, Algueró-Nadal A, Karaman R, Van Haele M, et al. Peritumoral activation of the Hippo pathway effectors YAP and TAZ suppresses liver cancer in mice. *Science*. 2019; 366:1029–34.  
<https://doi.org/10.1126/science.aaw9886>  
PMID:31754005
16. Hanahan D, Weinberg RA. Hallmarks of cancer: the next generation. *Cell*. 2011; 144:646–74.  
<https://doi.org/10.1016/j.cell.2011.02.013>  
PMID:21376230
17. Schmid MC, Varner JA. Myeloid cells in the tumor microenvironment: modulation of tumor angiogenesis and tumor inflammation. *J Oncol*. 2010; 2010:201026.  
<https://doi.org/10.1155/2010/201026>  
PMID:20490273
18. Engblom C, Pfirschke C, Pittet MJ. The role of myeloid cells in cancer therapies. *Nat Rev Cancer*. 2016; 16:447–62.  
<https://doi.org/10.1038/nrc.2016.54>  
PMID:27339708
19. Nakamura K, Smyth MJ. Myeloid immunosuppression and immune checkpoints in the tumor microenvironment. *Cell Mol Immunol*. 2020; 17:1–12.  
<https://doi.org/10.1038/s41423-019-0306-1>  
PMID:31611651
20. Karakasheva TA, Waldron TJ, Eruslanov E, Kim SB, Lee JS, O'Brien S, Hicks PD, Basu D, Singhal S, Malavasi F, Rustgi AK. CD38-Expressing Myeloid-Derived Suppressor Cells Promote Tumor Growth in a Murine Model of Esophageal Cancer. *Cancer Res*. 2015; 75:4074–85.  
<https://doi.org/10.1158/0008-5472.CAN-14-3639>  
PMID:26294209
21. Kim SS, Shen S, Miyauchi S, Sanders PD, Franiak-Pietryga I, Mell L, Gutkind JS, Cohen EEW, Califano JA, Sharabi AB. B Cells Improve Overall Survival in HPV-Associated Squamous Cell Carcinomas and Are Activated by Radiation and PD-1 Blockade. *Clin Cancer Res*. 2020; 26:3345–59.  
<https://doi.org/10.1158/1078-0432.CCR-19-3211>  
PMID:32193227
22. Germain C, Gnjjatic S, Tamzalit F, Knockaert S, Remark R, Goc J, Lepelletier A, Becht E, Katsahian S, Bizouard G, Validire P, Damotte D, Alifano M, et al. Presence of B cells in tertiary lymphoid structures is associated with a protective immunity in patients with lung cancer. *Am J Respir Crit Care Med*. 2014; 189:832–44.  
<https://doi.org/10.1164/rccm.201309-1611OC>  
PMID:24484236
23. Castino GF, Cortese N, Capretti G, Serio S, Di Caro G, Mineri R, Magrini E, Grizzi F, Cappello P, Novelli F, Spaggiari P, Roncalli M, Ridolfi C, et al. Spatial distribution of B cells predicts prognosis in human pancreatic adenocarcinoma. *Oncoimmunology*. 2015; 5:e1085147.  
<https://doi.org/10.1080/2162402X.2015.1085147>  
PMID:27141376
24. Wang WQ, Liu L, Xu HX, Wu CT, Xiang JF, Xu J, Liu C, Long J, Ni QX, Yu XJ. Infiltrating immune cells and gene mutations in pancreatic ductal adenocarcinoma. *Br J Surg*. 2016; 103:1189–99.  
<https://doi.org/10.1002/bjs.10187>  
PMID:27256393
25. Pretscher D, Distel LV, Grabenbauer GG, Wittlinger M, Buettner M, Niedobitek G. Distribution of immune cells in head and neck cancer: CD8+ T-cells and CD20+ B-cells in metastatic lymph nodes are associated with favourable outcome in patients with oro- and hypopharyngeal carcinoma. *BMC Cancer*. 2009; 9:292.  
<https://doi.org/10.1186/1471-2407-9-292>  
PMID:19698134
26. Schmidt M, Böhm D, von Törne C, Steiner E, Puhl A, Pilch H, Lehr HA, Hengstler JG, Kölbl H, Gehrman M. The humoral immune system has a key prognostic impact in node-negative breast cancer. *Cancer Res*. 2008; 68:5405–13.  
<https://doi.org/10.1158/0008-5472.CAN-07-5206>  
PMID:18593943
27. Ladányi A, Kiss J, Mohos A, Somlai B, Liskay G, Gilde K, Fejös Z, Gaudi I, Dobos J, Tímár J. Prognostic impact of B-cell density in cutaneous melanoma. *Cancer Immunol Immunother*. 2011; 60:1729–38.  
<https://doi.org/10.1007/s00262-011-1071-x>  
PMID:21779876
28. Fristedt R, Borg D, Hedner C, Berntsson J, Nodin B, Eberhard J, Mücke P, Jirstrom K. Prognostic impact of tumour-associated B cells and plasma cells in oesophageal and gastric adenocarcinoma. *J Gastrointest Oncol*. 2016; 7:848–59.  
<https://doi.org/10.21037/jgo.2016.11.07>  
PMID:28078109
29. Pös O, Radvanszky J, Buglyó G, Pös Z, Rusnakova D, Nagy B, Szemes T. DNA copy number variation: Main characteristics, evolutionary significance, and pathological aspects. *Biomed J*. 2021; 44:548–59.  
<https://doi.org/10.1016/j.bj.2021.02.003>  
PMID:34649833

30. Tirosh I, Venteicher AS, Hebert C, Escalante LE, Patel AP, Yizhak K, Fisher JM, Rodman C, Mount C, Filbin MG, Neftel C, Desai N, Nyman J, et al. Single-cell RNA-seq supports a developmental hierarchy in human oligodendroglioma. *Nature*. 2016; 539:309–13. <https://doi.org/10.1038/nature20123> PMID:[27806376](https://pubmed.ncbi.nlm.nih.gov/27806376/)
31. Hong X, Qiao S, Li F, Wang W, Jiang R, Wu H, Chen H, Liu L, Peng J, Wang J, Jia C, Liang X, Dai H, et al. Whole-genome sequencing reveals distinct genetic bases for insulinomas and non-functional pancreatic neuroendocrine tumours: leading to a new classification system. *Gut*. 2020; 69:877–87. <https://doi.org/10.1136/gutjnl-2018-317233> PMID:[31462556](https://pubmed.ncbi.nlm.nih.gov/31462556/)
32. Castro E, Jugurnauth-Little S, Karlsson Q, Al-Shahrour F, Piñeiro-Yañez E, Van de Poll F, Leongamornlert D, Dadaev T, Govindasami K, Guy M, Eeles R, Kote-Jarai Z, and UKGPCS, EMBRACE and IMPACT studies. High burden of copy number alterations and c-MYC amplification in prostate cancer from BRCA2 germline mutation carriers. *Ann Oncol*. 2015; 26:2293–300. <https://doi.org/10.1093/annonc/mdv356> PMID:[26347108](https://pubmed.ncbi.nlm.nih.gov/26347108/)
33. Erickson A, He M, Berglund E, Marklund M, Mirzazadeh R, Schultz N, Kvastad L, Andersson A, Bergensträhle L, Bergensträhle J, Larsson L, Alonso Galicia L, Shamikh A, et al. Spatially resolved clonal copy number alterations in benign and malignant tissue. *Nature*. 2022; 608:360–7. <https://doi.org/10.1038/s41586-022-05023-2> PMID:[35948708](https://pubmed.ncbi.nlm.nih.gov/35948708/)
34. Gao R, Bai S, Henderson YC, Lin Y, Schalck A, Yan Y, Kumar T, Hu M, Sei E, Davis A, Wang F, Shaitelman SF, Wang JR, et al. Delineating copy number and clonal substructure in human tumors from single-cell transcriptomes. *Nat Biotechnol*. 2021; 39:599–608. <https://doi.org/10.1038/s41587-020-00795-2> PMID:[33462507](https://pubmed.ncbi.nlm.nih.gov/33462507/)
35. Chen C, Wang C, Pang R, Liu H, Yin W, Chen J, Tao L. Comprehensive single-cell transcriptomic and proteomic analysis reveals NK cell exhaustion and unique tumor cell evolutionary trajectory in non-keratinizing nasopharyngeal carcinoma. *J Transl Med*. 2023; 21:278. <https://doi.org/10.1186/s12967-023-04112-8> PMID:[37098551](https://pubmed.ncbi.nlm.nih.gov/37098551/)
36. Fagone P, Jackowski S. Membrane phospholipid synthesis and endoplasmic reticulum function. *J Lipid Res*. 2009; 50:S311–6. <https://doi.org/10.1194/jlr.R800049-JLR200> PMID:[18952570](https://pubmed.ncbi.nlm.nih.gov/18952570/)
37. Olzmann JA, Carvalho P. Dynamics and functions of lipid droplets. *Nat Rev Mol Cell Biol*. 2019; 20:137–55. <https://doi.org/10.1038/s41580-018-0085-z> PMID:[30523332](https://pubmed.ncbi.nlm.nih.gov/30523332/)
38. Röhrig F, Schulze A. The multifaceted roles of fatty acid synthesis in cancer. *Nat Rev Cancer*. 2016; 16:732–49. <https://doi.org/10.1038/nrc.2016.89> PMID:[27658529](https://pubmed.ncbi.nlm.nih.gov/27658529/)
39. Beloribi-Djefafia S, Vasseur S, Guillaumond F. Lipid metabolic reprogramming in cancer cells. *Oncogenesis*. 2016; 5:e189. <https://doi.org/10.1038/oncsis.2015.49> PMID:[26807644](https://pubmed.ncbi.nlm.nih.gov/26807644/)
40. Currie E, Schulze A, Zechner R, Walther TC, Farese RV Jr. Cellular fatty acid metabolism and cancer. *Cell Metab*. 2013; 18:153–61. <https://doi.org/10.1016/j.cmet.2013.05.017> PMID:[23791484](https://pubmed.ncbi.nlm.nih.gov/23791484/)
41. Koundouros N, Pouligiannis G. Reprogramming of fatty acid metabolism in cancer. *Br J Cancer*. 2020; 122:4–22. <https://doi.org/10.1038/s41416-019-0650-z> PMID:[31819192](https://pubmed.ncbi.nlm.nih.gov/31819192/)
42. Hoy AJ, Nagarajan SR, Butler LM. Tumour fatty acid metabolism in the context of therapy resistance and obesity. *Nat Rev Cancer*. 2021; 21:753–66. <https://doi.org/10.1038/s41568-021-00388-4> PMID:[34417571](https://pubmed.ncbi.nlm.nih.gov/34417571/)
43. Seo J, Jeong DW, Park JW, Lee KW, Fukuda J, Chun YS. Fatty-acid-induced FABP5/HIF-1 reprograms lipid metabolism and enhances the proliferation of liver cancer cells. *Commun Biol*. 2020; 3:638. <https://doi.org/10.1038/s42003-020-01367-5> PMID:[33128030](https://pubmed.ncbi.nlm.nih.gov/33128030/)
44. O'Sullivan SE, Kaczocha M. FABP5 as a novel molecular target in prostate cancer. *Drug Discov Today*. 2020. [Epub ahead of print]. <https://doi.org/10.1016/j.drudis.2020.09.018> PMID:[32966866](https://pubmed.ncbi.nlm.nih.gov/32966866/)
45. Liu Z, Gao Z, Li B, Li J, Ou Y, Yu X, Zhang Z, Liu S, Fu X, Jin H, Wu J, Sun S, Sun S, Wu Q. Lipid-associated macrophages in the tumor-adipose microenvironment facilitate breast cancer progression. *Oncoimmunology*. 2022; 11:2085432. <https://doi.org/10.1080/2162402X.2022.2085432> PMID:[35712121](https://pubmed.ncbi.nlm.nih.gov/35712121/)
46. Lin R, Zhang H, Yuan Y, He Q, Zhou J, Li S, Sun Y, Li DY, Qiu HB, Wang W, Zhuang Z, Chen B, Huang Y, et al. Fatty Acid Oxidation Controls CD8<sup>+</sup> Tissue-Resident

- Memory T-cell Survival in Gastric Adenocarcinoma. *Cancer Immunol Res.* 2020; 8:479–92.  
<https://doi.org/10.1158/2326-6066.CIR-19-0702>  
PMID:[32075801](https://pubmed.ncbi.nlm.nih.gov/32075801/)
47. Zhang C, Liao Y, Liu P, Du Q, Liang Y, Ooi S, Qin S, He S, Yao S, Wang W. FABP5 promotes lymph node metastasis in cervical cancer by reprogramming fatty acid metabolism. *Theranostics.* 2020; 10:6561–80.  
<https://doi.org/10.7150/thno.44868>  
PMID:[32550890](https://pubmed.ncbi.nlm.nih.gov/32550890/)
48. Passos I, Stefanidou E, Meditskou-Eythymiadou S, Mironidou-Tzouveleki M, Manaki V, Magra V, Laskou S, Mantalovas S, Pantea S, Kesiosoglou I, Sapalidis K. A Review of the Significance in Measuring Preoperative and Postoperative Carcinoembryonic Antigen (CEA) Values in Patients with Medullary Thyroid Carcinoma (MTC). *Medicina (Kaunas).* 2021; 57:609.  
<https://doi.org/10.3390/medicina57060609>  
PMID:[34208296](https://pubmed.ncbi.nlm.nih.gov/34208296/)
49. Mizuno H, Miyake H, Nagai H, Yoshioka Y, Shibata K, Asai S, Takamizawa J, Yuasa N. Optimal cutoff value of preoperative CEA and CA19-9 for prognostic significance in patients with stage II/III colon cancer. *Langenbecks Arch Surg.* 2021; 406:1987–97.  
<https://doi.org/10.1007/s00423-021-02236-3>  
PMID:[34148158](https://pubmed.ncbi.nlm.nih.gov/34148158/)
50. Wang X, Tang X, Gu J, Sun Z, Yang S, Mu Y, Guan M, Chen K, Liu W, Ruan H, Xu J. CEACAM6 serves as a biomarker for leptomeningeal metastasis in lung adenocarcinoma. *Cancer Med.* 2023; 12:4521–9.  
<https://doi.org/10.1002/cam4.5221>  
PMID:[36082960](https://pubmed.ncbi.nlm.nih.gov/36082960/)
51. Kurlinkus B, Ger M, Kaupinis A, Jasiunas E, Valius M, Sileikis A. CEACAM6's Role as a Chemoresistance and Prognostic Biomarker for Pancreatic Cancer: A Comparison of CEACAM6's Diagnostic and Prognostic Capabilities with Those of CA19-9 and CEA. *Life (Basel).* 2021; 11:542.  
<https://doi.org/10.3390/life11060542>  
PMID:[34207784](https://pubmed.ncbi.nlm.nih.gov/34207784/)
52. Chen J, Li Q, An Y, Lv N, Xue X, Wei J, Jiang K, Wu J, Gao W, Qian Z, Dai C, Xu Z, Miao Y. CEACAM6 induces epithelial-mesenchymal transition and mediates invasion and metastasis in pancreatic cancer. *Int J Oncol.* 2013; 43:877–85.  
<https://doi.org/10.3892/ijo.2013.2015>  
PMID:[23857344](https://pubmed.ncbi.nlm.nih.gov/23857344/)
53. Pajdzik K, Wilamowski M, Żurawek D, Stopa KB, Nodzyński M, Kalita A, Jura J. Anterior gradient 2 promotes tumorigenesis through upregulation of CCAAT-enhancer binding protein beta and hypoxia-inducible factor-2 $\alpha$  and subsequent secretion of interleukin-6, interleukin-8, and vascular endothelial growth factor in the Caki-1 clear cell renal cell carcinoma cell line. *IUBMB Life.* 2020; 72:1807–18.  
<https://doi.org/10.1002/iub.2331>  
PMID:[32593213](https://pubmed.ncbi.nlm.nih.gov/32593213/)
54. Chevet E, Fessart D, Delom F, Mulot A, Vojtesek B, Hrstka R, Murray E, Gray T, Hupp T. Emerging roles for the pro-oncogenic anterior gradient-2 in cancer development. *Oncogene.* 2013; 32:2499–509.  
<https://doi.org/10.1038/onc.2012.346>  
PMID:[22945652](https://pubmed.ncbi.nlm.nih.gov/22945652/)
55. Tian S, Chu Y, Hu J, Ding X, Liu Z, Fu D, Yuan Y, Deng Y, Wang G, Wang L, Wang Z. Tumour-associated neutrophils secrete AGR2 to promote colorectal cancer metastasis via its receptor CD98hc-xCT. *Gut.* 2022; 71:2489–501.  
<https://doi.org/10.1136/gutjnl-2021-325137>  
PMID:[35086885](https://pubmed.ncbi.nlm.nih.gov/35086885/)
56. Fessart D, Villamor I, Chevet E, Delom F, Robert J. Integrative analysis of genomic and transcriptomic alterations of AGR2 and AGR3 in cancer. *Open Biol.* 2022; 12:220068.  
<https://doi.org/10.1098/rsob.220068>  
PMID:[35857928](https://pubmed.ncbi.nlm.nih.gov/35857928/)
57. Salm F, Znalesniak EB, Laskou A, Harder S, Schlüter H, Hoffmann W. Expression Profiling along the Murine Intestine: Different Mucosal Protection Systems and Alterations in *Tff1*-Deficient Animals. *Int J Mol Sci.* 2023; 24:12684.  
<https://doi.org/10.3390/ijms241612684>  
PMID:[37628863](https://pubmed.ncbi.nlm.nih.gov/37628863/)
58. Cui HY, Wang SJ, Song F, Cheng X, Nan G, Zhao Y, Qian MR, Chen X, Li JY, Liu FL, Zhu YM, Tian RF, Wang B, et al. CD147 receptor is essential for TFF3-mediated signaling regulating colorectal cancer progression. *Signal Transduct Target Ther.* 2021; 6:268.  
<https://doi.org/10.1038/s41392-021-00677-2>  
PMID:[34262017](https://pubmed.ncbi.nlm.nih.gov/34262017/)
59. Yusufu A, Shayimu P, Tuerdi R, Fang C, Wang F, Wang H. TFF3 and TFF1 expression levels are elevated in colorectal cancer and promote the malignant behavior of colon cancer by activating the EMT process. *Int J Oncol.* 2019; 55:789–804.  
<https://doi.org/10.3892/ijo.2019.4854>  
PMID:[31432157](https://pubmed.ncbi.nlm.nih.gov/31432157/)
60. Nakamura R, Oyama T, Tajiri R, Mizokami A, Namiki M, Nakamoto M, Ooi A. Expression and regulatory effects on cancer cell behavior of NELL1 and NELL2 in human renal cell carcinoma. *Cancer Sci.* 2015; 106:656–64.  
<https://doi.org/10.1111/cas.12649>  
PMID:[25726761](https://pubmed.ncbi.nlm.nih.gov/25726761/)
61. Meyer N, Penn LZ. Reflecting on 25 years with MYC.

- Nat Rev Cancer. 2008; 8:976–90.  
<https://doi.org/10.1038/nrc2231>  
PMID:19029958
62. Dang CV. MYC on the path to cancer. *Cell*. 2012; 149:22–35.  
<https://doi.org/10.1016/j.cell.2012.03.003>  
PMID:22464321
63. Schaub FX, Dhankani V, Berger AC, Trivedi M, Richardson AB, Shaw R, Zhao W, Zhang X, Ventura A, Liu Y, Ayer DE, Hurlin PJ, Cherniack AD, et al, and Cancer Genome Atlas Network. Pan-cancer Alterations of the MYC Oncogene and Its Proximal Network across the Cancer Genome Atlas. *Cell Syst*. 2018; 6:282–300.e2.  
<https://doi.org/10.1016/j.cels.2018.03.003>  
PMID:29596783
64. Conacci-Sorrell M, McFerrin L, Eisenman RN. An overview of MYC and its interactome. *Cold Spring Harb Perspect Med*. 2014; 4:a014357.  
<https://doi.org/10.1101/cshperspect.a014357>  
PMID:24384812
65. Kress TR, Sabò A, Amati B. MYC: connecting selective transcriptional control to global RNA production. *Nat Rev Cancer*. 2015; 15:593–607.  
<https://doi.org/10.1038/nrc3984>  
PMID:26383138
66. Carroll PA, Freie BW, Mathsyaraja H, Eisenman RN. The MYC transcription factor network: balancing metabolism, proliferation and oncogenesis. *Front Med*. 2018; 12:412–25.  
<https://doi.org/10.1007/s11684-018-0650-z>  
PMID:30054853
67. Casey SC, Baylot V, Felsher DW. The MYC oncogene is a global regulator of the immune response. *Blood*. 2018; 131:2007–15.  
<https://doi.org/10.1182/blood-2017-11-742577>  
PMID:29514782
68. Casey SC, Baylot V, Felsher DW. MYC: Master Regulator of Immune Privilege. *Trends Immunol*. 2017; 38:298–305.  
<https://doi.org/10.1016/j.it.2017.01.002>  
PMID:28233639
69. Dhanasekaran R, Deutzmann A, Mahauad-Fernandez WD, Hansen AS, Gouw AM, Felsher DW. The MYC oncogene - the grand orchestrator of cancer growth and immune evasion. *Nat Rev Clin Oncol*. 2022; 19:23–36.  
<https://doi.org/10.1038/s41571-021-00549-2>  
PMID:34508258
70. Lourenco C, Resetca D, Redel C, Lin P, MacDonald AS, Ciaccio R, Kenney TMG, Wei Y, Andrews DW, Sunnerhagen M, Arrowsmith CH, Raught B, Penn LZ. MYC protein interactors in gene transcription and cancer. *Nat Rev Cancer*. 2021; 21:579–91.  
<https://doi.org/10.1038/s41568-021-00367-9>  
PMID:34188192
71. Cheng D, Semmens K, McManus E, Chen Q, Meerzaman D, Wang X, Hafner M, Lewis BA, Takahashi H, Devaiah BN, Gegonne A, Singer DS. The nuclear transcription factor, TAF7, is a cytoplasmic regulator of protein synthesis. *Sci Adv*. 2021; 7:eabi5751.  
<https://doi.org/10.1126/sciadv.abi5751>  
PMID:34890234
72. Hao S, Tian W, Chen Y, Wang L, Jiang Y, Gao B, Luo D. MicroRNA-374c-5p inhibits the development of breast cancer through TATA-box binding protein associated factor 7-mediated transcriptional regulation of DEP domain containing 1. *J Cell Biochem*. 2019; 120:15360–8.  
<https://doi.org/10.1002/jcb.28803>  
PMID:31162714
73. Tian Y, Xu Y, Wang H, Shu R, Sun L, Zeng Y, Gong F, Lei Y, Wang K, Luo H. Comprehensive analysis of microarray expression profiles of circRNAs and lncRNAs with associated co-expression networks in human colorectal cancer. *Funct Integr Genomics*. 2019; 19:311–27.  
<https://doi.org/10.1007/s10142-018-0641-9>  
PMID:30446877
74. Yang L, Zeng W, Sun H, Huang F, Yang C, Cai X, Lu Y, Zeng J, Yang K. Bioinformatical Analysis of Gene Expression Omnibus Database Associates TAF7/CCNB1, TAF7/CCNA2, and GTF2E2/CDC20 Pathways with Glioblastoma Development and Prognosis. *World Neurosurg*. 2020; 138:e492–514.  
<https://doi.org/10.1016/j.wneu.2020.02.159>  
PMID:32147549
75. Kidokoro Y, Sakabe T, Haruki T, Kadonaga T, Nosaka K, Nakamura H, Umekita Y. Gene expression profiling by targeted RNA sequencing in pathological stage I lung adenocarcinoma with a solid component. *Lung Cancer*. 2020; 147:56–63.  
<https://doi.org/10.1016/j.lungcan.2020.06.035>  
PMID:32673827
76. Cargnello M, Roux PP. Activation and function of the MAPKs and their substrates, the MAPK-activated protein kinases. *Microbiol Mol Biol Rev*. 2011; 75:50–83.  
<https://doi.org/10.1128/MMBR.00031-10>  
PMID:21372320
77. Fabbri L, Chakraborty A, Robert C, Vagner S. The plasticity of mRNA translation during cancer progression and therapy resistance. *Nat Rev Cancer*.



- 2021; 21:558–77.  
<https://doi.org/10.1038/s41568-021-00380-y>  
 PMID:[34341537](https://pubmed.ncbi.nlm.nih.gov/34341537/)
78. Rovida E, Tusa I. Targeting MAPK in Cancer 2.0. *Int J Mol Sci.* 2022; 23:5702.  
<https://doi.org/10.3390/ijms23105702>  
 PMID:[35628511](https://pubmed.ncbi.nlm.nih.gov/35628511/)
79. Ullah R, Yin Q, Snell AH, Wan L. RAF-MEK-ERK pathway in cancer evolution and treatment. *Semin Cancer Biol.* 2022; 85:123–54.  
<https://doi.org/10.1016/j.semcan.2021.05.010>  
 PMID:[33992782](https://pubmed.ncbi.nlm.nih.gov/33992782/)
80. Kwak AW, Lee JY, Lee SO, Seo JH, Park JW, Choi YH, Cho SS, Yoon G, Lee MH, Shim JH. Echinatin induces reactive oxygen species-mediated apoptosis via JNK/p38 MAPK signaling pathway in colorectal cancer cells. *Phytother Res.* 2023; 37:563–77.  
<https://doi.org/10.1002/ptr.7634>  
 PMID:[36184899](https://pubmed.ncbi.nlm.nih.gov/36184899/)
81. Zhu X, Zhu J. CD4 T Helper Cell Subsets and Related Human Immunological Disorders. *Int J Mol Sci.* 2020; 21:8011.  
<https://doi.org/10.3390/ijms21128011>  
 PMID:[33126494](https://pubmed.ncbi.nlm.nih.gov/33126494/)
82. Zhu J, Yamane H, Paul WE. Differentiation of effector CD4 T cell populations (\*). *Annu Rev Immunol.* 2010; 28:445–89.  
<https://doi.org/10.1146/annurev-immunol-030409-101212>  
 PMID:[20192806](https://pubmed.ncbi.nlm.nih.gov/20192806/)
83. Philip M, Schietinger A. CD8<sup>+</sup> T cell differentiation and dysfunction in cancer. *Nat Rev Immunol.* 2022; 22:209–23.  
<https://doi.org/10.1038/s41577-021-00574-3>  
 PMID:[34253904](https://pubmed.ncbi.nlm.nih.gov/34253904/)
84. Gurram RK, Zhu J. Orchestration between ILC2s and Th2 cells in shaping type 2 immune responses. *Cell Mol Immunol.* 2019; 16:225–35.  
<https://doi.org/10.1038/s41423-019-0210-8>  
 PMID:[30792500](https://pubmed.ncbi.nlm.nih.gov/30792500/)
85. Stockinger B, Omenetti S. The dichotomous nature of T helper 17 cells. *Nat Rev Immunol.* 2017; 17:535–44.  
<https://doi.org/10.1038/nri.2017.50>  
 PMID:[28555673](https://pubmed.ncbi.nlm.nih.gov/28555673/)
86. Pompura SL, Hafler DA, Dominguez-Villar M. Fatty Acid Metabolism and T Cells in Multiple Sclerosis. *Front Immunol.* 2022; 13:869197.  
<https://doi.org/10.3389/fimmu.2022.869197>  
 PMID:[35603182](https://pubmed.ncbi.nlm.nih.gov/35603182/)
87. Gouirand V, Habrylo I, Rosenblum MD. Regulatory T Cells and Inflammatory Mediators in Autoimmune Disease. *J Invest Dermatol.* 2022; 142:774–80.  
<https://doi.org/10.1016/j.jid.2021.05.010>  
 PMID:[34284898](https://pubmed.ncbi.nlm.nih.gov/34284898/)
88. Li J, Zaslavsky M, Su Y, Guo J, Sikora MJ, van Unen V, Christophersen A, Chiou SH, Chen L, Li J, Ji X, Wilhelmy J, McSween AM, et al. KIR<sup>+</sup>CD8<sup>+</sup> T cells suppress pathogenic T cells and are active in autoimmune diseases and COVID-19. *Science.* 2022; 376:eabi9591.  
<https://doi.org/10.1126/science.abi9591>  
 PMID:[35258337](https://pubmed.ncbi.nlm.nih.gov/35258337/)
89. Moreau JM, Velegraki M, Bolyard C, Rosenblum MD, Li Z. Transforming growth factor- $\beta$ 1 in regulatory T cell biology. *Sci Immunol.* 2022; 7:eabi4613.  
<https://doi.org/10.1126/sciimmunol.abi4613>  
 PMID:[35302863](https://pubmed.ncbi.nlm.nih.gov/35302863/)
90. Adeegbe DO, Nishikawa H. Natural and induced T regulatory cells in cancer. *Front Immunol.* 2013; 4:190.  
<https://doi.org/10.3389/fimmu.2013.00190>  
 PMID:[23874336](https://pubmed.ncbi.nlm.nih.gov/23874336/)
91. Shan F, Somasundaram A, Bruno TC, Workman CJ, Vignali DAA. Therapeutic targeting of regulatory T cells in cancer. *Trends Cancer.* 2022; 8:944–61.  
<https://doi.org/10.1016/j.trecan.2022.06.008>  
 PMID:[35853825](https://pubmed.ncbi.nlm.nih.gov/35853825/)
92. Sakaguchi S, Mikami N, Wing JB, Tanaka A, Ichiyama K, Ohkura N. Regulatory T Cells and Human Disease. *Annu Rev Immunol.* 2020; 38:541–66.  
<https://doi.org/10.1146/annurev-immunol-042718-041717>  
 PMID:[32017635](https://pubmed.ncbi.nlm.nih.gov/32017635/)
93. Gu J, Zhou J, Chen Q, Xu X, Gao J, Li X, Shao Q, Zhou B, Zhou H, Wei S, Wang Q, Liang Y, Lu L. Tumor metabolite lactate promotes tumorigenesis by modulating MOESIN lactylation and enhancing TGF- $\beta$  signaling in regulatory T cells. *Cell Rep.* 2022; 40:111122.  
<https://doi.org/10.1016/j.celrep.2022.111122>  
 PMID:[35858574](https://pubmed.ncbi.nlm.nih.gov/35858574/)
94. Wang H, Zhang H, Wang Y, Brown ZJ, Xia Y, Huang Z, Shen C, Hu Z, Beane J, Ansa-Addo EA, Huang H, Tian D, Tsung A. Regulatory T-cell and neutrophil extracellular trap interaction contributes to carcinogenesis in non-alcoholic steatohepatitis. *J Hepatol.* 2021; 75:1271–83.  
<https://doi.org/10.1016/j.jhep.2021.07.032>  
 PMID:[34363921](https://pubmed.ncbi.nlm.nih.gov/34363921/)
95. Seif F, Torki Z, Zalpoor H, Habibi M, Pornour M. Breast cancer tumor microenvironment affects Treg/IL-17-producing Treg/Th17 cell axis: Molecular and therapeutic perspectives. *Mol Ther Oncolytics.* 2023;

- 28:132–57.  
<https://doi.org/10.1016/j.omto.2023.01.001>  
PMID:[36816749](https://pubmed.ncbi.nlm.nih.gov/36816749/)
96. Dikiy S, Rudensky AY. Principles of regulatory T cell function. *Immunity*. 2023; 56:240–55.  
<https://doi.org/10.1016/j.immuni.2023.01.004>  
PMID:[36792571](https://pubmed.ncbi.nlm.nih.gov/36792571/)
97. Iglesias-Escudero M, Arias-González N, Martínez-Cáceres E. Regulatory cells and the effect of cancer immunotherapy. *Mol Cancer*. 2023; 22:26.  
<https://doi.org/10.1186/s12943-023-01714-0>  
PMID:[36739406](https://pubmed.ncbi.nlm.nih.gov/36739406/)
98. Golubovskaya V, Wu L. Different Subsets of T Cells, Memory, Effector Functions, and CAR-T Immunotherapy. *Cancers (Basel)*. 2016; 8:36.  
<https://doi.org/10.3390/cancers8030036>  
PMID:[26999211](https://pubmed.ncbi.nlm.nih.gov/26999211/)
99. Lim AR, Rathmell WK, Rathmell JC. The tumor microenvironment as a metabolic barrier to effector T cells and immunotherapy. *Elife*. 2020; 9:e55185.  
<https://doi.org/10.7554/eLife.55185>  
PMID:[32367803](https://pubmed.ncbi.nlm.nih.gov/32367803/)
100. Chen J, Wang R, Liu Z, Fan J, Liu S, Tan S, Li X, Li B, Yang X. Unbalanced Glutamine Partitioning between CD8T Cells and Cancer Cells Accompanied by Immune Cell Dysfunction in Hepatocellular Carcinoma. *Cells*. 2022; 11:3924.  
<https://doi.org/10.3390/cells11233924>  
PMID:[36497182](https://pubmed.ncbi.nlm.nih.gov/36497182/)
101. Madden MZ, Rathmell JC. The Complex Integration of T-cell Metabolism and Immunotherapy. *Cancer Discov*. 2021; 11:1636–43.  
<https://doi.org/10.1158/2159-8290.CD-20-0569>  
PMID:[33795235](https://pubmed.ncbi.nlm.nih.gov/33795235/)
102. Dammeijer F, van Gulijk M, Mulder EE, Lukkes M, Klaase L, van den Bosch T, van Nimwegen M, Lau SP, Latupeirissa K, Schetters S, van Kooyk Y, Boon L, Moyaart A, et al. The PD-1/PD-L1-Checkpoint Restrains T cell Immunity in Tumor-Draining Lymph Nodes. *Cancer Cell*. 2020; 38:685–700.e8.  
<https://doi.org/10.1016/j.ccell.2020.09.001>  
PMID:[33007259](https://pubmed.ncbi.nlm.nih.gov/33007259/)
103. Kornepati AVR, Vadlamudi RK, Curiel TJ. Programmed death ligand 1 signals in cancer cells. *Nat Rev Cancer*. 2022; 22:174–89.  
<https://doi.org/10.1038/s41568-021-00431-4>  
PMID:[35031777](https://pubmed.ncbi.nlm.nih.gov/35031777/)
104. Cha JH, Chan LC, Li CW, Hsu JL, Hung MC. Mechanisms Controlling PD-L1 Expression in Cancer. *Mol Cell*. 2019; 76:359–70.  
<https://doi.org/10.1016/j.molcel.2019.09.030>  
PMID:[31668929](https://pubmed.ncbi.nlm.nih.gov/31668929/)
105. Reschke R, Gajewski TF. CXCL9 and CXCL10 bring the heat to tumors. *Sci Immunol*. 2022; 7:eabq6509.  
<https://doi.org/10.1126/sciimmunol.abq6509>  
PMID:[35867802](https://pubmed.ncbi.nlm.nih.gov/35867802/)
106. Hoch T, Schulz D, Eling N, Gómez JM, Levesque MP, Bodenmiller B. Multiplexed imaging mass cytometry of the chemokine milieu in melanoma characterizes features of the response to immunotherapy. *Sci Immunol*. 2022; 7:eabk1692.  
<https://doi.org/10.1126/sciimmunol.abk1692>  
PMID:[35363540](https://pubmed.ncbi.nlm.nih.gov/35363540/)
107. Bagheri H, Pourhanifeh MH, Derakhshan M, Mahjoubin-Tehran M, Ghasemi F, Mousavi S, Rafiei R, Abbaszadeh-Goudarzi K, Mirzaei HR, Mirzaei H. CXCL-10: a new candidate for melanoma therapy? *Cell Oncol (Dordr)*. 2020; 43:353–65.  
<https://doi.org/10.1007/s13402-020-00501-z>  
PMID:[32207043](https://pubmed.ncbi.nlm.nih.gov/32207043/)
108. Tokunaga R, Zhang W, Naseem M, Puccini A, Berger MD, Soni S, McSkane M, Baba H, Lenz HJ. CXCL9, CXCL10, CXCL11/CXCR3 axis for immune activation - A target for novel cancer therapy. *Cancer Treat Rev*. 2018; 63:40–7.  
<https://doi.org/10.1016/j.ctrv.2017.11.007>  
PMID:[29207310](https://pubmed.ncbi.nlm.nih.gov/29207310/)
109. Orr B, Mahdi H, Fang Y, Strange M, Uygun I, Rana M, Zhang L, Suarez Mora A, Pusateri A, Elishaev E, Kang C, Tseng G, Gooding W, et al. Phase I Trial Combining Chemokine-Targeting with Loco-Regional Chemoimmunotherapy for Recurrent, Platinum-Sensitive Ovarian Cancer Shows Induction of CXCR3 Ligands and Markers of Type 1 Immunity. *Clin Cancer Res*. 2022; 28:2038–49.  
<https://doi.org/10.1158/1078-0432.CCR-21-3659>  
PMID:[35046055](https://pubmed.ncbi.nlm.nih.gov/35046055/)
110. Loreth D, Schuette M, Zinke J, Mohme M, Piffko A, Schneegans S, Stadler J, Janning M, Loges S, Joesse SA, Lamszus K, Westphal M, Müller V, et al. CD74 and CD44 Expression on CTCs in Cancer Patients with Brain Metastasis. *Int J Mol Sci*. 2021; 22:6993.  
<https://doi.org/10.3390/ijms22136993>  
PMID:[34209696](https://pubmed.ncbi.nlm.nih.gov/34209696/)
111. Elyada E, Bolisetty M, Laise P, Flynn WF, Courtois ET, Burkhart RA, Teinor JA, Belleau P, Biffi G, Lucito MS, Sivajothi S, Armstrong TD, Engle DD, et al. Cross-Species Single-Cell Analysis of Pancreatic Ductal Adenocarcinoma Reveals Antigen-Presenting Cancer-Associated Fibroblasts. *Cancer Discov*. 2019; 9:1102–23.  
<https://doi.org/10.1158/2159-8290.CD-19-0094>  
PMID:[31197017](https://pubmed.ncbi.nlm.nih.gov/31197017/)
112. Zhang JF, Tao LY, Yang MW, Xu DP, Jiang SH, Fu XL, Liu DJ, Huo YM, Liu W, Yang JY, Hua R, Lu P, Sun YW. CD74 promotes perineural invasion of cancer cells

- and mediates neuroplasticity via the AKT/EGR-1/GDNF axis in pancreatic ductal adenocarcinoma. *Cancer Lett.* 2021; 508:47–58.  
<https://doi.org/10.1016/j.canlet.2021.03.016>  
PMID:[33766751](https://pubmed.ncbi.nlm.nih.gov/33766751/)
113. Osipyan A, Chen D, Dekker FJ. Epigenetic regulation in macrophage migration inhibitory factor (MIF)-mediated signaling in cancer and inflammation. *Drug Discov Today.* 2021; 26:1728–34.  
<https://doi.org/10.1016/j.drudis.2021.03.012>  
PMID:[33746067](https://pubmed.ncbi.nlm.nih.gov/33746067/)
114. Hassn Mesrati M, Syafruddin SE, Mohtar MA, Syahir A. CD44: A Multifunctional Mediator of Cancer Progression. *Biomolecules.* 2021; 11:1850.  
<https://doi.org/10.3390/biom11121850>  
PMID:[34944493](https://pubmed.ncbi.nlm.nih.gov/34944493/)
115. Chen C, Zhao S, Karnad A, Freeman JW. The biology and role of CD44 in cancer progression: therapeutic implications. *J Hematol Oncol.* 2018; 11:64.  
<https://doi.org/10.1186/s13045-018-0605-5>  
PMID:[29747682](https://pubmed.ncbi.nlm.nih.gov/29747682/)
116. Liao C, Wang Q, An J, Chen J, Li X, Long Q, Xiao L, Guan X, Liu J. CD44 Glycosylation as a Therapeutic Target in Oncology. *Front Oncol.* 2022; 12:883831.  
<https://doi.org/10.3389/fonc.2022.883831>  
PMID:[35936713](https://pubmed.ncbi.nlm.nih.gov/35936713/)
117. Yaghoobi Z, Movassaghpour A, Talebi M, Abdoli Shadbad M, Hajiasgharzadeh K, Pourvahdani S, Baradaran B. The role of CD44 in cancer chemoresistance: A concise review. *Eur J Pharmacol.* 2021; 903:174147.  
<https://doi.org/10.1016/j.ejphar.2021.174147>  
PMID:[33961871](https://pubmed.ncbi.nlm.nih.gov/33961871/)
118. Jankauskas SS, Wong DWL, Bucala R, Djudjaj S, Boor P. Evolving complexity of MIF signaling. *Cell Signal.* 2019; 57:76–88.  
<https://doi.org/10.1016/j.cellsig.2019.01.006>  
PMID:[30682543](https://pubmed.ncbi.nlm.nih.gov/30682543/)
119. Gao Y, Wang H, Chen S, An R, Chu Y, Li G, Wang Y, Xie X, Zhang J. Single-cell N<sup>6</sup>-methyladenosine regulator patterns guide intercellular communication of tumor microenvironment that contribute to colorectal cancer progression and immunotherapy. *J Transl Med.* 2022; 20:197.  
<https://doi.org/10.1186/s12967-022-03395-7>  
PMID:[35509079](https://pubmed.ncbi.nlm.nih.gov/35509079/)
120. Meyer-Siegler KL, Iczkowski KA, Leng L, Bucala R, Vera PL. Inhibition of macrophage migration inhibitory factor or its receptor (CD74) attenuates growth and invasion of DU-145 prostate cancer cells. *J Immunol.* 2006; 177:8730–9.  
<https://doi.org/10.4049/jimmunol.177.12.8730>  
PMID:[17142775](https://pubmed.ncbi.nlm.nih.gov/17142775/)
121. Grieb G, Kim BS, Simons D, Bernhagen J, Pallua N. MIF and CD74 - suitability as clinical biomarkers. *Mini Rev Med Chem.* 2014; 14:1125–31.  
<https://doi.org/10.2174/1389557515666150203143317>  
PMID:[25643609](https://pubmed.ncbi.nlm.nih.gov/25643609/)
